# Supplementary material
Source: MDPI journal article supplement (https://www.mdpi.com/2073-4336/2/3/365)
Supplement: s1 [file s1]

## Sheet: Sheet1
Experimental Data
round	bidders	fixdum	formnum	treatrnd	session	id	value	bid	valrank	va1dum	seal_dum
1	2	0	1	1	1	100	610	610	2	0	0
2	2	0	1	2	1	100	679		2	0	0
3	2	0	1	3	1	100	703	710	2	0	0
4	2	0	1	4	1	100	613	610	2	0	0
5	2	0	1	5	1	100	776		1	0	0
6	2	0	1	6	1	100	597	650	2	0	0
7	2	0	1	7	1	100	616	620	2	0	0
8	2	0	1	8	1	100	770		1	0	0
1	2	0	2	1	1	100	605	605	1	0	1
2	2	0	2	2	1	100	568	568	2	0	1
3	2	0	2	3	1	100	649	640	2	0	1
4	2	0	2	4	1	100	590	590	2	0	1
5	2	0	2	5	1	100	676	680	1	0	1
6	2	0	2	6	1	100	701	710	2	0	1
9	2	1	1	1	1	100	576		1	0	0
10	2	1	1	2	1	100	619		1	0	0
11	2	1	1	3	1	100	567		1	0	0
12	2	1	1	4	1	100	654		1	0	0
13	2	1	1	5	1	100	737		1	0	0
14	2	1	1	6	1	100	669		1	0	0
15	2	1	1	7	1	100	648	650	2	0	0
16	2	1	1	8	1	100	512		2	0	0
7	2	1	2	1	1	100	730	730	1	0	1
8	2	1	2	2	1	100	735	740	2	0	1
9	2	1	2	3	1	100	608	610	1	0	1
10	2	1	2	4	1	100	589	590	2	0	1
11	2	1	2	5	1	100	535	540	2	0	1
12	2	1	2	6	1	100	736	740	1	0	1
13	2	1	2	7	1	100	773	780	1	0	1
14	2	1	2	8	1	100	729	730	1	0	1
15	2	1	2	9	1	100	536	540	2	0	1
16	2	1	2	10	1	100	549	550	2	0	1
1	2	0	1	1	1	100	700	710	2	1	0
2	2	0	1	2	1	100	700	710	2	1	0
3	2	0	1	3	1	100	800		1	1	0
4	2	0	1	4	1	100	700	700	2	1	0
5	2	0	1	5	1	100	700	720	2	1	0
6	2	0	1	6	1	100	700		2	1	0
1	2	0	2	1	1	100	700	700	2	1	1
2	2	0	2	2	1	100	700	640	2	1	1
3	2	0	2	3	1	100	800	750	1	1	1
4	2	0	2	4	1	100	700	700	2	1	1
5	2	0	2	5	1	100	700	700	2	1	1
6	2	0	2	6	1	100	700	700	2	1	1
1	2	1	1	1	1	100	800	770	1	1	0
2	2	1	1	2	1	100	800	710	1	1	0
3	2	1	1	3	1	100	700		2	1	0
4	2	1	1	4	1	100	700		2	1	0
5	2	1	1	5	1	100	800		1	1	0
6	2	1	1	6	1	100	700		2	1	0
7	2	1	2	1	1	100	800	800	1	1	1
8	2	1	2	2	1	100	800	800	1	1	1
9	2	1	2	3	1	100	700	700	2	1	1
10	2	1	2	4	1	100	700	500	2	1	1
11	2	1	2	5	1	100	700	500	2	1	1
12	2	1	2	6	1	100	800	800	1	1	1
1	2	0	1	1	1	101	625	620	1	0	0
2	2	0	1	2	1	101	778		1	0	0
3	2	0	1	3	1	101	629	620	2	0	0
4	2	0	1	4	1	101	655		1	0	0
5	2	0	1	5	1	101	704		2	0	0
6	2	0	1	6	1	101	602	600	2	0	0
7	2	0	1	7	1	101	526	510	2	0	0
8	2	0	1	8	1	101	580	580	2	0	0
2	2	0	2	2	1	101	686	686	2	0	1
3	2	0	2	3	1	101	574	570	2	0	1
4	2	0	2	4	1	101	698	690	1	0	1
5	2	0	2	5	1	101	512	600	1	0	1
6	2	0	2	6	1	101	589	600	2	0	1
9	2	1	1	1	1	101	717	720	2	0	0
10	2	1	1	2	1	101	664	680	2	0	0
11	2	1	1	3	1	101	514	510	2	0	0
12	2	1	1	4	1	101	736		1	0	0
13	2	1	1	5	1	101	532	530	2	0	0
14	2	1	1	6	1	101	607	590	2	0	0
15	2	1	1	7	1	101	528	510	2	0	0
16	2	1	1	8	1	101	716	700	2	0	0
7	2	1	2	1	1	101	659	660	1	0	1
8	2	1	2	2	1	101	501	600	2	0	1
9	2	1	2	3	1	101	715	800	2	0	1
10	2	1	2	4	1	101	621	620	1	0	1
11	2	1	2	5	1	101	588	620	2	0	1
12	2	1	2	6	1	101	765	800	1	0	1
13	2	1	2	7	1	101	622	650	1	0	1
14	2	1	2	8	1	101	610	650	2	0	1
15	2	1	2	9	1	101	578	600	2	0	1
16	2	1	2	10	1	101	762	800	1	0	1
1	2	0	1	1	1	101	800		1	1	0
2	2	0	1	2	1	101	700		2	1	0
3	2	0	1	3	1	101	700	700	2	1	0
4	2	0	1	4	1	101	800		1	1	0
5	2	0	1	5	1	101	800		1	1	0
6	2	0	1	6	1	101	800		1	1	0
1	2	0	2	1	1	101	800	500	1	1	1
2	2	0	2	2	1	101	800	800	1	1	1
2	2	0	2	2	1	101	700	500	2	1	1
3	2	0	2	3	1	101	800	780	1	1	1
3	2	0	2	3	1	101	700	490	2	1	1
4	2	0	2	4	1	101	700	510	2	1	1
5	2	0	2	5	1	101	800	510	1	1	1
6	2	0	2	6	1	101	700	550	2	1	1
1	2	1	1	1	1	101	800	710	1	1	0
2	2	1	1	2	1	101	700	690	2	1	0
3	2	1	1	3	1	101	700	700	2	1	0
4	2	1	1	4	1	101	700		2	1	0
5	2	1	1	5	1	101	700	640	2	1	0
6	2	1	1	6	1	101	700		2	1	0
7	2	1	2	1	1	101	800	710	1	1	1
8	2	1	2	2	1	101	800	710	1	1	1
9	2	1	2	3	1	101	800	710	1	1	1
10	2	1	2	4	1	101	700	680	2	1	1
11	2	1	2	5	1	101	800	710	1	1	1
12	2	1	2	6	1	101	700	650	2	1	1
1	2	0	1	1	1	102	602		2	0	0
2	2	0	1	2	1	102	773		1	0	0
3	2	0	1	3	1	102	799		1	0	0
4	2	0	1	4	1	102	635		2	0	0
5	2	0	1	5	1	102	570	570	2	0	0
7	2	0	1	7	1	102	597	600	2	0	0
8	2	0	1	8	1	102	516	600	2	0	0
1	2	0	2	1	1	102	629	620	2	0	1
2	2	0	2	2	1	102	615	615	1	0	1
3	2	0	2	3	1	102	720	720	1	0	1
4	2	0	2	4	1	102	556	550	1	0	1
5	2	0	2	5	1	102	506	500	2	0	1
6	2	0	2	6	1	102	569	570	2	0	1
9	2	1	1	1	1	102	635		1	0	0
10	2	1	1	2	1	102	675		1	0	0
11	2	1	1	3	1	102	588	610	1	0	0
12	2	1	1	4	1	102	650		1	0	0
13	2	1	1	5	1	102	752		1	0	0
14	2	1	1	6	1	102	727		1	0	0
15	2	1	1	7	1	102	680		1	0	0
16	2	1	1	8	1	102	792		1	0	0
7	2	1	2	1	1	102	650	650	2	0	1
8	2	1	2	2	1	102	702	700	1	0	1
9	2	1	2	3	1	102	719	720	1	0	1
10	2	1	2	4	1	102	546	540	2	0	1
11	2	1	2	5	1	102	613	610	1	0	1
12	2	1	2	6	1	102	549	540	2	0	1
13	2	1	2	7	1	102	579	580	2	0	1
14	2	1	2	8	1	102	690	690	1	0	1
15	2	1	2	9	1	102	748	750	1	0	1
16	2	1	2	10	1	102	753	750	2	0	1
1	2	0	1	1	1	102	800		1	1	0
2	2	0	1	2	1	102	700	700	2	1	0
3	2	0	1	3	1	102	700	710	2	1	0
4	2	0	1	4	1	102	800		1	1	0
5	2	0	1	5	1	102	700	700	2	1	0
6	2	0	1	6	1	102	800		1	1	0
1	2	0	2	1	1	102	700	700	2	1	1
3	2	0	2	3	1	102	700	700	2	1	1
4	2	0	2	4	1	102	800	800	1	1	1
5	2	0	2	5	1	102	800	800	1	1	1
6	2	0	2	6	1	102	700	700	2	1	1
1	2	1	1	1	1	102	800		1	1	0
2	2	1	1	2	1	102	800		1	1	0
3	2	1	1	3	1	102	700	700	2	1	0
4	2	1	1	4	1	102	800		1	1	0
5	2	1	1	5	1	102	700	700	2	1	0
6	2	1	1	6	1	102	800		1	1	0
7	2	1	2	1	1	102	700	700	2	1	1
8	2	1	2	2	1	102	800	800	1	1	1
9	2	1	2	3	1	102	800	800	1	1	1
10	2	1	2	4	1	102	800	800	1	1	1
11	2	1	2	5	1	102	800	800	1	1	1
12	2	1	2	6	1	102	800	800	1	1	1
1	2	0	1	1	1	103	724	720	2	0	0
2	2	0	1	2	1	103	503	500	2	0	0
3	2	0	1	3	1	103	551	520	2	0	0
4	2	0	1	4	1	103	575		1	0	0
5	2	0	1	5	1	103	535	530	2	0	0
6	2	0	1	6	1	103	561	330	2	0	0
7	2	0	1	7	1	103	714		1	0	0
8	2	0	1	8	1	103	760	480	1	0	0
1	2	0	2	1	1	103	604	550	2	0	1
2	2	0	2	2	1	103	754	700	1	0	1
3	2	0	2	3	1	103	514	500	2	0	1
4	2	0	2	4	1	103	682	650	1	0	1
5	2	0	2	5	1	103	679	650	1	0	1
6	2	0	2	6	1	103	661	650	1	0	1
9	2	1	1	1	1	103	610	610	2	0	0
10	2	1	1	2	1	103	544	550	2	0	0
11	2	1	1	3	1	103		610	2	0	0
12	2	1	1	4	1	103	522	540	2	0	0
13	2	1	1	5	1	103	611	620	2	0	0
14	2	1	1	6	1	103	533	520	2	0	0
15	2	1	1	7	1	103	647	660	2	0	0
16	2	1	1	8	1	103	500	500	2	0	0
7	2	1	2	1	1	103	700	670	2	0	1
8	2	1	2	2	1	103	755	750	1	0	1
9	2	1	2	3	1	103	530	520	2	0	1
10	2	1	2	4	1	103	775	755	1	0	1
11	2	1	2	5	1	103	577	570	1	0	1
12	2	1	2	6	1	103	549	570	2	0	1
13	2	1	2	7	1	103	573	570	2	0	1
14	2	1	2	8	1	103	643	640	2	0	1
15	2	1	2	9	1	103	655	640	1	0	1
16	2	1	2	10	1	103	684	680	1	0	1
1	2	0	1	1	1	103	700	690	2	1	0
2	2	0	1	2	1	103	800		1	1	0
3	2	0	1	3	1	103	700	700	2	1	0
4	2	0	1	4	1	103	700	700	2	1	0
5	2	0	1	5	1	103	700	710	2	1	0
6	2	0	1	6	1	103	800		1	1	0
1	2	0	2	1	1	103	700	660	2	1	1
2	2	0	2	2	1	103	800	710	1	1	1
3	2	0	2	3	1	103	700	690	2	1	1
4	2	0	2	4	1	103	700	690	2	1	1
5	2	0	2	5	1	103	700	690	2	1	1
6	2	0	2	6	1	103	800	710	1	1	1
1	2	1	1	1	1	103	700		2	1	0
2	2	1	1	2	1	103	800		1	1	0
3	2	1	1	3	1	103	800		1	1	0
4	2	1	1	4	1	103	800	360	1	1	0
5	2	1	1	5	1	103	800		1	1	0
6	2	1	1	6	1	103	800	700	1	1	0
7	2	1	2	1	1	103	800	710	1	1	1
8	2	1	2	2	1	103	700	700	2	1	1
9	2	1	2	3	1	103	700	700	2	1	1
10	2	1	2	4	1	103	700	700	2	1	1
11	2	1	2	5	1	103	700	700	2	1	1
12	2	1	2	6	1	103	700	700	2	1	1
1	2	0	1	1	1	104	648	640	2	0	0
2	2	0	1	2	1	104	651		1	0	0
3	2	0	1	3	1	104	567		1	0	0
4	2	0	1	4	1	104	697		1	0	0
5	2	0	1	5	1	104	520	540	2	0	0
7	2	0	1	7	1	104	765	700	1	0	0
8	2	0	1	8	1	104	628		2	0	0
2	2	0	2	2	1	104	798	710	1	0	1
3	2	0	2	3	1	104	594	570	2	0	1
4	2	0	2	4	1	104	605	590	2	0	1
5	2	0	2	5	1	104	582	570	2	0	1
6	2	0	2	6	1	104	533	520	2	0	1
9	2	1	1	1	1	104	758	720	1	0	0
10	2	1	1	2	1	104	729		1	0	0
11	2	1	1	3	1	104	713		1	0	0
12	2	1	1	4	1	104	637	630	2	0	0
13	2	1	1	5	1	104	712		1	0	0
14	2	1	1	6	1	104	798		1	0	0
15	2	1	1	7	1	104	657		1	0	0
16	2	1	1	8	1	104	781		1	0	0
7	2	1	2	1	1	104	768	700	1	0	1
8	2	1	2	2	1	104	723	700	1	0	1
9	2	1	2	3	1	104	568	550	2	0	1
10	2	1	2	4	1	104	623	600	2	0	1
11	2	1	2	5	1	104	736	700	1	0	1
12	2	1	2	6	1	104	645	630	1	0	1
13	2	1	2	7	1	104	610	600	2	0	1
14	2	1	2	8	1	104	780	750	1	0	1
15	2	1	2	9	1	104	710	690	1	0	1
16	2	1	2	10	1	104	754	730	1	0	1
1	2	0	1	1	1	104	800		1	1	0
2	2	0	1	2	1	104	700	730	2	1	0
3	2	0	1	3	1	104	800		1	1	0
4	2	0	1	4	1	104	700		2	1	0
5	2	0	1	5	1	104	800		1	1	0
6	2	0	1	6	1	104	700	760	2	1	0
1	2	0	2	1	1	104	800	700	1	1	1
2	2	0	2	2	1	104	800	700	1	1	1
3	2	0	2	3	1	104	700	660	2	1	1
4	2	0	2	4	1	104	800	700	1	1	1
5	2	0	2	5	1	104	700	610	2	1	1
6	2	0	2	6	1	104	800	700	1	1	1
1	2	1	1	1	1	104	700		2	1	0
2	2	1	1	2	1	104	700		2	1	0
3	2	1	1	3	1	104	800	710	1	1	0
4	2	1	1	4	1	104	800	700	1	1	0
5	2	1	1	5	1	104	700	700	2	1	0
6	2	1	1	6	1	104	800	710	1	1	0
7	2	1	2	1	1	104	700	550	2	1	1
8	2	1	2	2	1	104	700	700	2	1	1
9	2	1	2	3	1	104	700	700	2	1	1
10	2	1	2	4	1	104	700	700	2	1	1
11	2	1	2	5	1	104	800	700	1	1	1
12	2	1	2	6	1	104	700	700	2	1	1
1	2	0	1	1	1	105	730		1	0	0
2	2	0	1	2	1	105	681	660	1	0	0
3	2	0	1	3	1	105	645	640	2	0	0
4	2	0	1	4	1	105	545	540	2	0	0
5	2	0	1	5	1	105	714	710	1	0	0
6	2	0	1	6	1	105	657	650	2	0	0
6	2	0	1	6	1	105	712		1	0	0
7	2	0	1	7	1	105	675		1	0	0
8	2	0	1	8	1	105	716	700	2	0	0
1	2	0	2	1	1	105	680	670	2	0	1
2	2	0	2	2	1	105	522	522	2	0	1
3	2	0	2	3	1	105	731	730	1	0	1
4	2	0	2	4	1	105	679	670	1	0	1
5	2	0	2	5	1	105	690	690	2	0	1
6	2	0	2	6	1	105	794	790	1	0	1
9	2	1	1	1	1	105	520	510	2	0	0
10	2	1	1	2	1	105	561	560	2	0	0
11	2	1	1	3	1	105	550	540	2	0	0
12	2	1	1	4	1	105	587	570	2	0	0
13	2	1	1	5	1	105	710	700	2	0	0
14	2	1	1	6	1	105	612	610	2	0	0
15	2	1	1	7	1	105	750		1	0	0
16	2	1	1	8	1	105	520	510	1	0	0
7	2	1	2	1	1	105	698	690	1	0	1
8	2	1	2	2	1	105	624	620	2	0	1
9	2	1	2	3	1	105	561	560	1	0	1
10	2	1	2	4	1	105	676	670	1	0	1
11	2	1	2	5	1	105	662	660	2	0	1
12	2	1	2	6	1	105	654	650	1	0	1
13	2	1	2	7	1	105	561	560	1	0	1
14	2	1	2	8	1	105	590	590	1	0	1
15	2	1	2	9	1	105	692	690	1	0	1
16	2	1	2	10	1	105	573	570	2	0	1
1	2	0	1	1	1	105	800		1	1	0
2	2	0	1	2	1	105	800	690	1	1	0
3	2	0	1	3	1	105	800	700	1	1	0
4	2	0	1	4	1	105	800	690	1	1	0
5	2	0	1	5	1	105	700	710	2	1	0
6	2	0	1	6	1	105	700	700	2	1	0
1	2	0	2	1	1	105	800	770	1	1	1
2	2	0	2	2	1	105	800	750	1	1	1
3	2	0	2	3	1	105	800	730	1	1	1
4	2	0	2	4	1	105	700	700	2	1	1
5	2	0	2	5	1	105	700	700	2	1	1
6	2	0	2	6	1	105	800	760	1	1	1
1	2	1	1	1	1	105	700	720	2	1	0
2	2	1	1	2	1	105	700	740	2	1	0
3	2	1	1	3	1	105	800		1	1	0
4	2	1	1	4	1	105	700	800	2	1	0
5	2	1	1	5	1	105	800		1	1	0
6	2	1	1	6	1	105	700	750	2	1	0
7	2	1	2	1	1	105	700	700	2	1	1
8	2	1	2	2	1	105	700	700	2	1	1
9	2	1	2	3	1	105	800	760	1	1	1
10	2	1	2	4	1	105	800	760	1	1	1
11	2	1	2	5	1	105	800	760	1	1	1
12	2	1	2	6	1	105	700	700	2	1	1
1	2	0	1	1	1	106	694		1	0	0
2	2	0	1	2	1	106	773	770	2	0	0
3	2	0	1	3	1	106	688		1	0	0
4	2	0	1	4	1	106	608	590	2	0	0
5	2	0	1	5	1	106	736		1	0	0
7	2	0	1	7	1	106	719		1	0	0
8	2	0	1	8	1	106	697		1	0	0
1	2	0	2	1	1	106	721	721	1	0	1
2	2	0	2	2	1	106	614	610	2	0	1
3	2	0	2	3	1	106	654	650	1	0	1
4	2	0	2	4	1	106	643	650	1	0	1
5	2	0	2	5	1	106	509	510	2	0	1
6	2	0	2	6	1	106	763	780	1	0	1
9	2	1	1	1	1	106	781		1	0	0
10	2	1	1	2	1	106	614	610	2	0	0
11	2	1	1	3	1	106	730		1	0	0
12	2	1	1	4	1	106	602	600	2	0	0
13	2	1	1	5	1	106	761		1	0	0
14	2	1	1	6	1	106	631	530	2	0	0
15	2	1	1	7	1	106	532		1	0	0
16	2	1	1	8	1	106	613		1	0	0
7	2	1	2	1	1	106	691	700	2	0	1
8	2	1	2	2	1	106	502	600	2	0	1
9	2	1	2	3	1	106	654	660	1	0	1
10	2	1	2	4	1	106	677	690	1	0	1
11	2	1	2	5	1	106	569	600	2	0	1
12	2	1	2	6	1	106	543	580	2	0	1
13	2	1	2	7	1	106	637	640	1	0	1
14	2	1	2	8	1	106	604	640	2	0	1
15	2	1	2	9	1	106	546	590	2	0	1
16	2	1	2	10	1	106	507	590	2	0	1
1	2	0	1	1	1	106	700	680	2	1	0
2	2	0	1	2	1	106	800		1	1	0
3	2	0	1	3	1	106	700	710	2	1	0
4	2	0	1	4	1	106	800		1	1	0
5	2	0	1	5	1	106	800		1	1	0
6	2	0	1	6	1	106	800		1	1	0
1	2	0	2	1	1	106	800	770	1	1	1
2	2	0	2	2	1	106	800	710	1	1	1
3	2	0	2	3	1	106	700	690	2	1	1
4	2	0	2	4	1	106	700	700	2	1	1
5	2	0	2	5	1	106	800	700	1	1	1
6	2	0	2	6	1	106	700	700	2	1	1
1	2	1	1	1	1	106	800		1	1	0
2	2	1	1	2	1	106	700	700	2	1	0
3	2	1	1	3	1	106	700	700	2	1	0
4	2	1	1	4	1	106	700	690	2	1	0
5	2	1	1	5	1	106	700	700	2	1	0
6	2	1	1	6	1	106	700	700	2	1	0
7	2	1	2	1	1	106	800	710	1	1	1
8	2	1	2	2	1	106	800	770	1	1	1
9	2	1	2	3	1	106	700	700	2	1	1
10	2	1	2	4	1	106	800	750	1	1	1
11	2	1	2	5	1	106	800	760	1	1	1
12	2	1	2	6	1	106	700	700	2	1	1
1	2	0	1	1	1	107	782		1	0	0
2	2	0	1	2	1	107	581	580	2	0	0
3	2	0	1	3	1	107	561		2	0	0
4	2	0	1	4	1	107	748		1	0	0
5	2	0	1	5	1	107	593	580	2	0	0
6	2	0	1	6	1	107	669		1	0	0
7	2	0	1	7	1	107	749		2	0	0
8	2	0	1	8	1	107	780	780	1	0	0
1	2	0	2	1	1	107	782	780	2	0	1
2	2	0	2	2	1	107	792	790	1	0	1
3	2	0	2	3	1	107	737	730	2	0	1
4	2	0	2	4	1	107	607	600	2	0	1
5	2	0	2	5	1	107	787	780	1	0	1
6	2	0	2	6	1	107	603	600	1	0	1
9	2	1	1	1	1	107	664		1	0	0
10	2	1	1	2	1	107	614	610	2	0	0
11	2	1	1	3	1	107	772		1	0	0
12	2	1	1	4	1	107	668		1	0	0
13	2	1	1	5	1	107	571	560	2	0	0
14	2	1	1	6	1	107	531	530	2	0	0
15	2	1	1	7	1	107	685		1	0	0
16	2	1	1	8	1	107	705	700	1	0	0
7	2	1	2	1	1	107	650	650	2	0	1
8	2	1	2	2	1	107	706	700	2	0	1
9	2	1	2	3	1	107	764	760	1	0	1
10	2	1	2	4	1	107	763	760	2	0	1
11	2	1	2	5	1	107	755	750	1	0	1
12	2	1	2	6	1	107	602	600	2	0	1
13	2	1	2	7	1	107	757	750	1	0	1
14	2	1	2	8	1	107	743	740	1	0	1
15	2	1	2	9	1	107	547	540	2	0	1
16	2	1	2	10	1	107	674	670	1	0	1
1	2	0	1	1	1	107	700	700	2	1	0
2	2	0	1	2	1	107	700		2	1	0
3	2	0	1	3	1	107	700		2	1	0
4	2	0	1	4	1	107	800		1	1	0
5	2	0	1	5	1	107	800		1	1	0
6	2	0	1	6	1	107	700	700	2	1	0
1	2	0	2	1	1	107	700	700	2	1	1
2	2	0	2	2	1	107	700	700	2	1	1
4	2	0	2	4	1	107	800	790	1	1	1
5	2	0	2	5	1	107	800	790	1	1	1
6	2	0	2	6	1	107	800	790	1	1	1
1	2	1	1	1	1	107	700	700	2	1	0
2	2	1	1	2	1	107	800		1	1	0
3	2	1	1	3	1	107	800		1	1	0
4	2	1	1	4	1	107	800		1	1	0
5	2	1	1	5	1	107	800		1	1	0
6	2	1	1	6	1	107	800		1	1	0
7	2	1	2	1	1	107	700	700	2	1	1
8	2	1	2	2	1	107	800	780	1	1	1
9	2	1	2	3	1	107	800	790	1	1	1
10	2	1	2	4	1	107	700	700	2	1	1
11	2	1	2	5	1	107	700	700	2	1	1
12	2	1	2	6	1	107	700	710	2	1	1
1	2	0	1	1	1	108	794		1	0	0
2	2	0	1	2	1	108	548	540	2	0	0
3	2	0	1	3	1	108	652		1	0	0
4	2	0	1	4	1	108	568	550	2	0	0
5	2	0	1	5	1	108	746		1	0	0
6	2	0	1	6	1	108	761		1	0	0
6	2	0	1	6	1	108	602		1	0	0
7	2	0	1	7	1	108	711		1	0	0
8	2	0	1	8	1	108	722		1	0	0
1	2	0	2	1	1	108	786	780	1	0	1
2	2	0	2	2	1	108	707	707	1	0	1
3	2	0	2	3	1	108	618	610	2	0	1
4	2	0	2	4	1	108	677	670	1	0	1
5	2	0	2	5	1	108	683	680	2	0	1
6	2	0	2	6	1	108	779	770	1	0	1
9	2	1	1	1	1	108	724		1	0	0
10	2	1	1	2	1	108	599	600	2	0	0
11	2	1	1	3	1	108	505	510	2	0	0
12	2	1	1	4	1	108	534	540	2	0	0
13	2	1	1	5	1	108	696		1	0	0
14	2	1	1	6	1	108	616	610	2	0	0
15	2	1	1	7	1	108	580	600	2	0	0
16	2	1	1	8	1	108	572		2	0	0
7	2	1	2	1	1	108	532	530	2	0	1
8	2	1	2	2	1	108	795	795	1	0	1
9	2	1	2	3	1	108	540	600	2	0	1
10	2	1	2	4	1	108	549	600	2	0	1
11	2	1	2	5	1	108	758	750	1	0	1
12	2	1	2	6	1	108	503	600	2	0	1
13	2	1	2	7	1	108	501	600	2	0	1
14	2	1	2	8	1	108	506	510	2	0	1
15	2	1	2	9	1	108	570	570	2	0	1
16	2	1	2	10	1	108	723	720	1	0	1
1	2	0	1	1	1	108	800		1	1	0
2	2	0	1	2	1	108	800	700	1	1	0
3	2	0	1	3	1	108	800		1	1	0
4	2	0	1	4	1	108	700	690	2	1	0
5	2	0	1	5	1	108	700	700	2	1	0
6	2	0	1	6	1	108	800	710	1	1	0
1	2	0	2	1	1	108	800	800	1	1	1
2	2	0	2	2	1	108	700	700	2	1	1
3	2	0	2	3	1	108	800	800	1	1	1
4	2	0	2	4	1	108	800	800	1	1	1
5	2	0	2	5	1	108	800	800	1	1	1
6	2	0	2	6	1	108	800	800	1	1	1
1	2	1	1	1	1	108	700	700	2	1	0
2	2	1	1	2	1	108	700		2	1	0
3	2	1	1	3	1	108	800		1	1	0
4	2	1	1	4	1	108	800		1	1	0
5	2	1	1	5	1	108	800		1	1	0
6	2	1	1	6	1	108	800		1	1	0
7	2	1	2	1	1	108	800	800	1	1	1
8	2	1	2	2	1	108	700	710	2	1	1
9	2	1	2	3	1	108	700	710	2	1	1
10	2	1	2	4	1	108	800	800	1	1	1
11	2	1	2	5	1	108	800	800	1	1	1
12	2	1	2	6	1	108	800	800	1	1	1
1	2	0	1	1	1	109	650	660	2	0	0
2	2	0	1	2	1	109	514	510	2	0	0
3	2	0	1	3	1	109	746		1	0	0
4	2	0	1	4	1	109	653	650	1	0	0
5	2	0	1	5	1	109	705		1	0	0
6	2	0	1	6	1	109	580		1	0	0
7	2	0	1	7	1	109	708		1	0	0
8	2	0	1	8	1	109	758		2	0	0
1	2	0	2	1	1	109	536	536	2	0	1
2	2	0	2	2	1	109	631	630	2	0	1
3	2	0	2	3	1	109	789	780	1	0	1
4	2	0	2	4	1	109	638	630	2	0	1
5	2	0	2	5	1	109	639	630	2	0	1
6	2	0	2	6	1	109	603	600	2	0	1
9	2	1	1	1	1	109	569	570	2	0	0
10	2	1	1	2	1	109	746		1	0	0
11	2	1	1	3	1	109	734	730	2	0	0
12	2	1	1	4	1	109	659	660	2	0	0
13	2	1	1	5	1	109	590		1	0	0
14	2	1	1	6	1	109	620		1	0	0
15	2	1	1	7	1	109	673	670	2	0	0
16	2	1	1	8	1	109	582		2	0	0
7	2	1	2	1	1	109	578	570	2	0	1
8	2	1	2	2	1	109	792	790	1	0	1
9	2	1	2	3	1	109	676	670	1	0	1
10	2	1	2	4	1	109	665	660	1	0	1
11	2	1	2	5	1	109	522	520	2	0	1
12	2	1	2	6	1	109	661	660	2	0	1
13	2	1	2	7	1	109	537	530	2	0	1
14	2	1	2	8	1	109	556	550	1	0	1
15	2	1	2	9	1	109	749	740	1	0	1
16	2	1	2	10	1	109	689	680	2	0	1
1	2	0	1	1	1	109	700	710	2	1	0
2	2	0	1	2	1	109	800		1	1	0
3	2	0	1	3	1	109	800		1	1	0
4	2	0	1	4	1	109	700	760	2	1	0
5	2	0	1	5	1	109	700	720	2	1	0
6	2	0	1	6	1	109	700	780	2	1	0
1	2	0	2	1	1	109	800	710	1	1	1
2	2	0	2	2	1	109	700	700	2	1	1
3	2	0	2	3	1	109	800	710	1	1	1
4	2	0	2	4	1	109	800	710	1	1	1
5	2	0	2	5	1	109	700	700	2	1	1
6	2	0	2	6	1	109	700	700	2	1	1
1	2	1	1	1	1	109	800		1	1	0
2	2	1	1	2	1	109	700	780	2	1	0
3	2	1	1	3	1	109	800		1	1	0
4	2	1	1	4	1	109	700	780	2	1	0
5	2	1	1	5	1	109	800		1	1	0
6	2	1	1	6	1	109	700	750	2	1	0
7	2	1	2	1	1	109	700	700	2	1	1
8	2	1	2	2	1	109	700	700	2	1	1
9	2	1	2	3	1	109	700	710	2	1	1
10	2	1	2	4	1	109	800	700	1	1	1
11	2	1	2	5	1	109	700	720	2	1	1
12	2	1	2	6	1	109	800		1	1	1
1	2	0	1	1	1	110	662		1	0	0
2	2	0	1	2	1	110	521		1	0	0
3	2	0	1	3	1	110	544	530	2	0	0
4	2	0	1	4	1	110	589	580	2	0	0
5	2	0	1	5	1	110	629	620	1	0	0
6	2	0	1	6	1	110	566	550	2	0	0
7	2	0	1	7	1	110	558	550	2	0	0
8	2	0	1	8	1	110	739		1	0	0
1	2	0	2	1	1	110	762	762	1	0	1
2	2	0	2	2	1	110	742	742	2	0	1
3	2	0	2	3	1	110	680	680	1	0	1
4	2	0	2	4	1	110	517	520	2	0	1
5	2	0	2	5	1	110	691	690	1	0	1
6	2	0	2	6	1	110	711	710	1	0	1
9	2	1	1	1	1	110	707	710	2	0	0
10	2	1	1	2	1	110	623		1	0	0
11	2	1	1	3	1	110	578	570	2	0	0
12	2	1	1	4	1	110	729		1	0	0
13	2	1	1	5	1	110	586	580	2	0	0
14	2	1	1	6	1	110	682		1	0	0
15	2	1	1	7	1	110	509	510	2	0	0
16	2	1	1	8	1	110	503	500	2	0	0
7	2	1	2	1	1	110	714	710	1	0	1
8	2	1	2	2	1	110	558	550	2	0	1
9	2	1	2	3	1	110	580	580	2	0	1
10	2	1	2	4	1	110	535	530	2	0	1
11	2	1	2	5	1	110	688	680	1	0	1
12	2	1	2	6	1	110	788	780	1	0	1
13	2	1	2	7	1	110	729	720	1	0	1
14	2	1	2	8	1	110	509	500	2	0	1
15	2	1	2	9	1	110	746	740	2	0	1
16	2	1	2	10	1	110	718	710	1	0	1
1	2	0	1	1	1	110	800		1	1	0
2	2	0	1	2	1	110	800		1	1	0
3	2	0	1	3	1	110	700	690	2	1	0
4	2	0	1	4	1	110	700	700	2	1	0
5	2	0	1	5	1	110	800		1	1	0
6	2	0	1	6	1	110	800		1	1	0
1	2	0	2	1	1	110	700	700	2	1	1
2	2	0	2	2	1	110	800	790	1	1	1
3	2	0	2	3	1	110	800	800	1	1	1
4	2	0	2	4	1	110	700	700	2	1	1
5	2	0	2	5	1	110	700	700	2	1	1
6	2	0	2	6	1	110	800	800	1	1	1
1	2	1	1	1	1	110	700	700	2	1	0
2	2	1	1	2	1	110	800		1	1	0
3	2	1	1	3	1	110	700	700	2	1	0
4	2	1	1	4	1	110	800		1	1	0
5	2	1	1	5	1	110	700	710	2	1	0
6	2	1	1	6	1	110	800		1	1	0
7	2	1	2	1	1	110	700	720	2	1	1
8	2	1	2	2	1	110	700	700	2	1	1
9	2	1	2	3	1	110	800	800	1	1	1
10	2	1	2	4	1	110	700	690	2	1	1
11	2	1	2	5	1	110	700	700	2	1	1
12	2	1	2	6	1	110	800	800	1	1	1
1	2	0	1	1	1	111	528	590	2	0	0
2	2	0	1	2	1	111	684		1	0	0
3	2	0	1	3	1	111	759		1	0	0
4	2	0	1	4	1	111	738		1	0	0
5	2	0	1	5	1	111	502		2	0	0
6	2	0	1	6	1	111	714		1	0	0
6	2	0	1	6	1	111	527	590	2	0	0
7	2	0	1	7	1	111	555	550	2	0	0
8	2	0	1	8	1	111	560	610	2	0	0
1	2	0	2	1	1	111	636	600	1	0	1
2	2	0	2	2	1	111	651	650	1	0	1
3	2	0	2	3	1	111	720	710	1	0	1
4	2	0	2	4	1	111	615	610	2	0	1
5	2	0	2	5	1	111	776	770	1	0	1
6	2	0	2	6	1	111	500	500	2	0	1
9	2	1	1	1	1	111	590	600	2	0	0
10	2	1	1	2	1	111	749		1	0	0
11	2	1	1	3	1	111	777		1	0	0
12	2	1	1	4	1	111	624		1	0	0
13	2	1	1	5	1	111	657	690	2	0	0
14	2	1	1	6	1	111	756		1	0	0
15	2	1	1	7	1	111	614		1	0	0
16	2	1	1	8	1	111	584	590	1	0	0
7	2	1	2	1	1	111	659	660	1	0	1
8	2	1	2	2	1	111	780	680	1	0	1
9	2	1	2	3	1	111	623	620	2	0	1
10	2	1	2	4	1	111	791	790	1	0	1
11	2	1	2	5	1	111	752	750	2	0	1
12	2	1	2	6	1	111	646	640	1	0	1
13	2	1	2	7	1	111	730	730	2	0	1
14	2	1	2	8	1	111	555	550	2	0	1
15	2	1	2	9	1	111	702	700	1	0	1
16	2	1	2	10	1	111	658	650	2	0	1
1	2	0	1	1	1	111	700	710	2	1	0
2	2	0	1	2	1	111	700	700	2	1	0
3	2	0	1	3	1	111	800		1	1	0
4	2	0	1	4	1	111	800		1	1	0
5	2	0	1	5	1	111	800		1	1	0
6	2	0	1	6	1	111	700	700	2	1	0
1	2	0	2	1	1	111	700	700	2	1	1
2	2	0	2	2	1	111	700	700	2	1	1
3	2	0	2	3	1	111	700	690	2	1	1
4	2	0	2	4	1	111	800	800	1	1	1
5	2	0	2	5	1	111	800	800	1	1	1
6	2	0	2	6	1	111	700	700	2	1	1
1	2	1	1	1	1	111	800		1	1	0
2	2	1	1	2	1	111	800	700	1	1	0
3	2	1	1	3	1	111	700	720	2	1	0
4	2	1	1	4	1	111	700	710	2	1	0
5	2	1	1	5	1	111	700	720	2	1	0
6	2	1	1	6	1	111	700	700	2	1	0
7	2	1	2	1	1	111	800	800	1	1	1
8	2	1	2	2	1	111	800	750	1	1	1
9	2	1	2	3	1	111	800	770	1	1	1
10	2	1	2	4	1	111	800	800	1	1	1
11	2	1	2	5	1	111	700	700	2	1	1
12	2	1	2	6	1	111	800	710	1	1	1
13	2	0	1	1	2	200	753		1	0	0
14	2	0	1	2	2	200	523		2	0	0
15	2	0	1	3	2	200	747		1	0	0
16	2	0	1	4	2	200	737		1	0	0
17	2	0	1	5	2	200	594	600	2	0	0
18	2	0	1	6	2	200	772		1	0	0
19	2	0	1	7	2	200	658	650	2	0	0
20	2	0	1	8	2	200	792		1	0	0
13	2	0	2	1	2	200	668	600	2	0	1
14	2	0	2	2	2	200	690	650	2	0	1
15	2	0	2	3	2	200	519	650	2	0	1
16	2	0	2	4	2	200	553	600	2	0	1
17	2	0	2	5	2	200	593	600	2	0	1
18	2	0	2	6	2	200	725	700	2	0	1
19	2	0	2	7	2	200	573	600	1	0	1
20	2	0	2	8	2	200	716	716	2	0	1
21	2	1	1	1	2	200	683		1	0	0
22	2	1	1	2	2	200	629	620	2	0	0
23	2	1	1	3	2	200	645	650	2	0	0
24	2	1	1	4	2	200	789		1	0	0
25	2	1	1	5	2	200	789		1	0	0
26	2	1	1	6	2	200	732	730	2	0	0
27	2	1	1	7	2	200	627		1	0	0
28	2	1	1	8	2	200	548	620	2	0	0
21	2	1	2	1	2	200	720	770	2	0	1
22	2	1	2	2	2	200	736	780	1	0	1
23	2	1	2	3	2	200	592	640	2	0	1
24	2	1	2	4	2	200	634	670	2	0	1
25	2	1	2	5	2	200	548	600	2	0	1
26	2	1	2	6	2	200	578	630	1	0	1
27	2	1	2	7	2	200	524	560	2	0	1
28	2	1	2	8	2	200	667	750	1	0	1
1	2	0	1	1	2	200	700		2	1	0
2	2	0	1	2	2	200	700	710	2	1	0
3	2	0	1	3	2	200	800		1	1	0
4	2	0	1	4	2	200	700	720	2	1	0
5	2	0	1	5	2	200	700	780	2	1	0
6	2	0	1	6	2	200	700	780	2	1	0
1	2	0	2	1	2	200	700	710	2	1	1
2	2	0	2	2	2	200	700	710	2	1	1
3	2	0	2	3	2	200	800	720	1	1	1
4	2	0	2	4	2	200	700	710	2	1	1
5	2	0	2	5	2	200	700	710	2	1	1
6	2	0	2	6	2	200	700	710	2	1	1
7	2	1	1	1	2	200	700	790	2	1	0
8	2	1	1	2	2	200	700	790	2	1	0
9	2	1	1	3	2	200	800	740	1	1	0
10	2	1	1	4	2	200	800		1	1	0
11	2	1	1	5	2	200	700	710	2	1	0
12	2	1	1	6	2	200	700	740	2	1	0
7	2	1	2	1	2	200	700	710	2	1	1
8	2	1	2	2	2	200	700	710	2	1	1
9	2	1	2	3	2	200	700	710	2	1	1
10	2	1	2	4	2	200	700	710	2	1	1
11	2	1	2	5	2	200	700	710	2	1	1
12	2	1	2	6	2	200	700	710	2	1	1
13	2	0	1	1	2	201	668		2	0	0
14	2	0	1	2	2	201	718	710	2	0	0
15	2	0	1	3	2	201	659	550	2	0	0
16	2	0	1	4	2	201	735		1	0	0
17	2	0	1	5	2	201	639	620	2	0	0
18	2	0	1	6	2	201	738	730	2	0	0
19	2	0	1	7	2	201	772		1	0	0
20	2	0	1	8	2	201	587	630	2	0	0
13	2	0	2	1	2	201	753	730	1	0	1
14	2	0	2	2	2	201	783	710	1	0	1
15	2	0	2	3	2	201	673	660	2	0	1
16	2	0	2	4	2	201	792	730	1	0	1
17	2	0	2	5	2	201	619	610	1	0	1
18	2	0	2	6	2	201	637	640	2	0	1
19	2	0	2	7	2	201	507	510	2	0	1
20	2	0	2	8	2	201	716	700	1	0	1
21	2	1	1	1	2	201	693		1	0	0
22	2	1	1	2	2	201	704	730	2	0	0
23	2	1	1	3	2	201	788		1	0	0
24	2	1	1	4	2	201	665		1	0	0
25	2	1	1	5	2	201	515	660	2	0	0
26	2	1	1	6	2	201	771		1	0	0
27	2	1	1	7	2	201	728	740	2	0	0
28	2	1	1	8	2	201	533	740	2	0	0
21	2	1	2	1	2	201	506	500	2	0	1
22	2	1	2	2	2	201	674	670	2	0	1
23	2	1	2	3	2	201	558	550	2	0	1
24	2	1	2	4	2	201	736	740	2	0	1
25	2	1	2	5	2	201	690	690	1	0	1
26	2	1	2	6	2	201	501	500	2	0	1
27	2	1	2	7	2	201	766	760	1	0	1
28	2	1	2	8	2	201	503	500	2	0	1
1	2	0	1	1	2	201	800		1	1	0
2	2	0	1	2	2	201	800		1	1	0
3	2	0	1	3	2	201	700	710	2	1	0
4	2	0	1	4	2	201	800		1	1	0
5	2	0	1	5	2	201	700	700	2	1	0
6	2	0	1	6	2	201	800		1	1	0
1	2	0	2	1	2	201	800	750	1	1	1
2	2	0	2	2	2	201	700	690	2	1	1
3	2	0	2	3	2	201	800	730	1	1	1
4	2	0	2	4	2	201	700	700	2	1	1
5	2	0	2	5	2	201	800	720	1	1	1
6	2	0	2	6	2	201	800	730	1	1	1
7	2	1	1	1	2	201	800		1	1	0
8	2	1	1	2	2	201	700		2	1	0
9	2	1	1	3	2	201	700	710	2	1	0
10	2	1	1	4	2	201	800		1	1	0
11	2	1	1	5	2	201	800		1	1	0
12	2	1	1	6	2	201	800	710	1	1	0
7	2	1	2	1	2	201	700	690	2	1	1
8	2	1	2	2	2	201	700	680	2	1	1
9	2	1	2	3	2	201	700	700	2	1	1
10	2	1	2	4	2	201	800	730	1	1	1
11	2	1	2	5	2	201	700	710	2	1	1
12	2	1	2	6	2	201	800	730	1	1	1
13	2	0	1	1	2	202	728	720	2	0	0
14	2	0	1	2	2	202	502	500	2	0	0
15	2	0	1	3	2	202	504	500	2	0	0
16	2	0	1	4	2	202	517	510	2	0	0
17	2	0	1	5	2	202	732		1	0	0
18	2	0	1	6	2	202	633	620	1	0	0
19	2	0	1	7	2	202	723	720	2	0	0
20	2	0	1	8	2	202	654	660	2	0	0
13	2	0	2	1	2	202	728	720	2	0	1
14	2	0	2	2	2	202	523	520	2	0	1
15	2	0	2	3	2	202	747	740	1	0	1
16	2	0	2	4	2	202	737	730	1	0	1
17	2	0	2	5	2	202	594	600	2	0	1
18	2	0	2	6	2	202	772	780	1	0	1
19	2	0	2	7	2	202	658	660	2	0	1
20	2	0	2	8	2	202	792	800	1	0	1
21	2	1	1	1	2	202	529	520	2	0	0
22	2	1	1	2	2	202	699		1	0	0
23	2	1	1	3	2	202	760		1	0	0
24	2	1	1	4	2	202	722		1	0	0
25	2	1	1	5	2	202	549	550	2	0	0
26	2	1	1	6	2	202	677	670	1	0	0
27	2	1	1	7	2	202	744		1	0	0
28	2	1	1	8	2	202	645		1	0	0
21	2	1	2	1	2	202	584	580	2	0	1
22	2	1	2	2	2	202	583	580	2	0	1
23	2	1	2	3	2	202	677	670	2	0	1
24	2	1	2	4	2	202	534	530	2	0	1
25	2	1	2	5	2	202	514	510	2	0	1
26	2	1	2	6	2	202	587	580	2	0	1
27	2	1	2	7	2	202	617	610	2	0	1
28	2	1	2	8	2	202	599	590	2	0	1
1	2	0	1	1	2	202	800	10	1	1	0
2	2	0	1	2	2	202	700	700	2	1	0
3	2	0	1	3	2	202	800		1	1	0
4	2	0	1	4	2	202	700	690	2	1	0
5	2	0	1	5	2	202	800		1	1	0
6	2	0	1	6	2	202	800		1	1	0
1	2	0	2	1	2	202	700	780	2	1	1
2	2	0	2	2	2	202	800	800	1	1	1
3	2	0	2	3	2	202	700	780	2	1	1
4	2	0	2	4	2	202	800	800	1	1	1
5	2	0	2	5	2	202	800	800	1	1	1
6	2	0	2	6	2	202	700	750	2	1	1
7	2	1	1	1	2	202	700	690	2	1	0
8	2	1	1	2	2	202	700	690	2	1	0
9	2	1	1	3	2	202	800	800	1	1	0
10	2	1	1	4	2	202	700	700	2	1	0
11	2	1	1	5	2	202	800		1	1	0
12	2	1	1	6	2	202	800		1	1	0
7	2	1	2	1	2	202	800	800	1	1	1
8	2	1	2	2	2	202	800	800	1	1	1
9	2	1	2	3	2	202	800	800	1	1	1
10	2	1	2	4	2	202	800	800	1	1	1
11	2	1	2	5	2	202	800	800	1	1	1
12	2	1	2	6	2	202	800	800	1	1	1
13	2	0	1	1	2	203	620	660	2	0	0
14	2	0	1	2	2	203	565		2	0	0
15	2	0	1	3	2	203	687		1	0	0
16	2	0	1	4	2	203	637		1	0	0
17	2	0	1	5	2	203	796		1	0	0
18	2	0	1	6	2	203	772		1	0	0
19	2	0	1	7	2	203	674		2	0	0
20	2	0	1	8	2	203	663	680	2	0	0
13	2	0	2	1	2	203	779	700	1	0	1
14	2	0	2	2	2	203	502	630	2	0	1
15	2	0	2	3	2	203	504	540	2	0	1
16	2	0	2	4	2	203	517	600	2	0	1
17	2	0	2	5	2	203	732	720	1	0	1
18	2	0	2	6	2	203	633	630	1	0	1
18	2	0	2	6	2	203	521	520	2	0	1
19	2	0	2	7	2	203	723	720	1	0	1
20	2	0	2	8	2	203	654	660	2	0	1
21	2	1	1	1	2	203	525		2	0	0
22	2	1	1	2	2	203	531	560	2	0	0
23	2	1	1	3	2	203	778		2	0	0
24	2	1	1	4	2	203	583	600	1	0	0
25	2	1	1	5	2	203	618		1	0	0
26	2	1	1	6	2	203	618		1	0	0
27	2	1	1	7	2	203	587	590	2	0	0
28	2	1	1	8	2	203	511		1	0	0
21	2	1	2	1	2	203	599	600	1	0	1
22	2	1	2	2	2	203	700	710	1	0	1
23	2	1	2	3	2	203	650	660	2	0	1
24	2	1	2	4	2	203	708	720	1	0	1
25	2	1	2	5	2	203	641	0	2	0	1
26	2	1	2	6	2	203	599	600	2	0	1
27	2	1	2	7	2	203	601	610	2	0	1
28	2	1	2	8	2	203	609	620	2	0	1
1	2	0	1	1	2	203	800		1	1	0
2	2	0	1	2	2	203	800		1	1	0
3	2	0	1	3	2	203	800		1	1	0
4	2	0	1	4	2	203	700	690	2	1	0
5	2	0	1	5	2	203	800		1	1	0
6	2	0	1	6	2	203	800		1	1	0
1	2	0	2	1	2	203	700	700	2	1	1
2	2	0	2	2	2	203	800	750	1	1	1
3	2	0	2	3	2	203	700	700	2	1	1
4	2	0	2	4	2	203	700	710	2	1	1
5	2	0	2	5	2	203	700	730	2	1	1
6	2	0	2	6	2	203	700	720	2	1	1
7	2	1	1	1	2	203	800		1	1	0
8	2	1	1	2	2	203	800		1	1	0
9	2	1	1	3	2	203	700		2	1	0
10	2	1	1	4	2	203	800		1	1	0
11	2	1	1	5	2	203	700	710	2	1	0
12	2	1	1	6	2	203	700	780	2	1	0
7	2	1	2	1	2	203	700	730	2	1	1
8	2	1	2	2	2	203	700	740	2	1	1
9	2	1	2	3	2	203	700	850	2	1	1
10	2	1	2	4	2	203	700	710	2	1	1
11	2	1	2	5	2	203	700	750	2	1	1
12	2	1	2	6	2	203	700	750	2	1	1
13	2	0	1	1	2	204	751	690	1	0	0
14	2	0	1	2	2	204	711		1	0	0
15	2	0	1	3	2	204	713		1	0	0
16	2	0	1	4	2	204	664	680	2	0	0
17	2	0	1	5	2	204	691		1	0	0
18	2	0	1	6	2	204	521		2	0	0
19	2	0	1	7	2	204	772		1	0	0
20	2	0	1	8	2	204	728		1	0	0
13	2	0	2	1	2	204	654	650	2	0	1
14	2	0	2	2	2	204	540	550	2	0	1
15	2	0	2	3	2	204	576	570	2	0	1
16	2	0	2	4	2	204	693	690	1	0	1
17	2	0	2	5	2	204	515	510	2	0	1
18	2	0	2	6	2	204	779	770	1	0	1
19	2	0	2	7	2	204	689	680	2	0	1
20	2	0	2	8	2	204	596	590	1	0	1
21	2	1	1	1	2	204	781		1	0	0
22	2	1	1	2	2	204	642	670	2	0	0
23	2	1	1	3	2	204	726	730	2	0	0
24	2	1	1	4	2	204	582	600	2	0	0
25	2	1	1	5	2	204	581		1	0	0
26	2	1	1	6	2	204	667		2	0	0
27	2	1	1	7	2	204	633	630	2	0	0
28	2	1	1	8	2	204	589	580	2	0	0
21	2	1	2	1	2	204	519	550	2	0	1
22	2	1	2	2	2	204	649	650	2	0	1
23	2	1	2	3	2	204	707	710	1	0	1
24	2	1	2	4	2	204	673	680	2	0	1
25	2	1	2	5	2	204	717	720	1	0	1
26	2	1	2	6	2	204	703	710	1	0	1
27	2	1	2	7	2	204	618	620	1	0	1
28	2	1	2	8	2	204	773	780	1	0	1
1	2	0	1	1	2	204	700	730	2	1	0
2	2	0	1	2	2	204	700	690	2	1	0
3	2	0	1	3	2	204	700	700	2	1	0
4	2	0	1	4	2	204	800		1	1	0
5	2	0	1	5	2	204	800		1	1	0
6	2	0	1	6	2	204	800		1	1	0
1	2	0	2	1	2	204	800	750	1	1	1
2	2	0	2	2	2	204	800	750	1	1	1
3	2	0	2	3	2	204	800	790	1	1	1
4	2	0	2	4	2	204	700	710	2	1	1
5	2	0	2	5	2	204	800	700	1	1	1
6	2	0	2	6	2	204	800	700	1	1	1
7	2	1	1	1	2	204	700	760	2	1	0
8	2	1	1	2	2	204	800	710	1	1	0
9	2	1	1	3	2	204	800		1	1	0
10	2	1	1	4	2	204	700	720	2	1	0
11	2	1	1	5	2	204	700	750	2	1	0
12	2	1	1	6	2	204	700		2	1	0
7	2	1	2	1	2	204	800	800	1	1	1
8	2	1	2	2	2	204	800	850	1	1	1
9	2	1	2	3	2	204	800	850	1	1	1
10	2	1	2	4	2	204	700	700	2	1	1
11	2	1	2	5	2	204	800	800	1	1	1
12	2	1	2	6	2	204	700	710	2	1	1
13	2	0	1	1	2	205	788		1	0	0
14	2	0	1	2	2	205	530	540	1	0	0
15	2	0	1	3	2	205	527	530	2	0	0
16	2	0	1	4	2	205	739		1	0	0
17	2	0	1	5	2	205	664	640	1	0	0
18	2	0	1	6	2	205	756	750	2	0	0
19	2	0	1	7	2	205	788		1	0	0
20	2	0	1	8	2	205	673	680	2	0	0
13	2	0	2	1	2	205	620	620	2	0	1
14	2	0	2	2	2	205	723	723	1	0	1
15	2	0	2	3	2	205	745	750	1	0	1
16	2	0	2	4	2	205	679	679	1	0	1
17	2	0	2	5	2	205	767	780	1	0	1
18	2	0	2	6	2	205	625	700	2	0	1
19	2	0	2	7	2	205	718	770	2	0	1
20	2	0	2	8	2	205	555	600	2	0	1
21	2	1	1	1	2	205	553	560	2	0	0
22	2	1	1	2	2	205	644		1	0	0
23	2	1	1	3	2	205	770		1	0	0
24	2	1	1	4	2	205	573	580	2	0	0
25	2	1	1	5	2	205	726	720	2	0	0
26	2	1	1	6	2	205	753		1	0	0
27	2	1	1	7	2	205	556	570	2	0	0
28	2	1	1	8	2	205	702		1	0	0
21	2	1	2	1	2	205	653	650	1	0	1
22	2	1	2	2	2	205	661	660	1	0	1
23	2	1	2	3	2	205	755	760	1	0	1
24	2	1	2	4	2	205	625	620	1	0	1
25	2	1	2	5	2	205	651	650	1	0	1
26	2	1	2	6	2	205	613	610	1	0	1
27	2	1	2	7	2	205	742	740	1	0	1
28	2	1	2	8	2	205	732	730	1	0	1
1	2	0	1	1	2	205	800	720	1	1	0
2	2	0	1	2	2	205	700	720	2	1	0
3	2	0	1	3	2	205	700	730	2	1	0
4	2	0	1	4	2	205	800		1	1	0
5	2	0	1	5	2	205	800		1	1	0
6	2	0	1	6	2	205	700	770	2	1	0
1	2	0	2	1	2	205	800	800	1	1	1
2	2	0	2	2	2	205	800	800	1	1	1
3	2	0	2	3	2	205	800	800	1	1	1
4	2	0	2	4	2	205	800	800	1	1	1
5	2	0	2	5	2	205	700	750	2	1	1
6	2	0	2	6	2	205	800	800	1	1	1
7	2	1	1	1	2	205	800		1	1	0
8	2	1	1	2	2	205	800		1	1	0
9	2	1	1	3	2	205	800		1	1	0
10	2	1	1	4	2	205	800		1	1	0
11	2	1	1	5	2	205	800		1	1	0
12	2	1	1	6	2	205	700	710	2	1	0
7	2	1	2	1	2	205	700	700	2	1	1
8	2	1	2	2	2	205	700	750	2	1	1
9	2	1	2	3	2	205	700	800	2	1	1
10	2	1	2	4	2	205	700	700	2	1	1
11	2	1	2	5	2	205	700	750	2	1	1
12	2	1	2	6	2	205	700	750	2	1	1
13	2	0	1	1	2	206	654		1	0	0
14	2	0	1	2	2	206	723		1	0	0
15	2	0	1	3	2	206	745		1	0	0
16	2	0	1	4	2	206	679	670	2	0	0
17	2	0	1	5	2	206	767		1	0	0
18	2	0	1	6	2	206	625		1	0	0
19	2	0	1	7	2	206	718	720	2	0	0
20	2	0	1	8	2	206	555	540	1	0	0
13	2	0	2	1	2	206	684	680	2	0	1
14	2	0	2	2	2	206	565	560	1	0	1
15	2	0	2	3	2	206	687	680	1	0	1
16	2	0	2	4	2	206	637	630	1	0	1
17	2	0	2	5	2	206	796	790	1	0	1
18	2	0	2	6	2	206	772	770	1	0	1
19	2	0	2	7	2	206	674	670	2	0	1
20	2	0	2	8	2	206	663	660	2	0	1
21	2	1	1	1	2	206	534	520	2	0	0
22	2	1	1	2	2	206	777	760	2	0	0
23	2	1	1	3	2	206	660	660	2	0	0
24	2	1	1	4	2	206	646		1	0	0
25	2	1	1	5	2	206	734		1	0	0
26	2	1	1	6	2	206	509	500	2	0	0
27	2	1	1	7	2	206	705		1	0	0
28	2	1	1	8	2	206	507	530	2	0	0
21	2	1	2	1	2	206	760	760	1	0	1
22	2	1	2	2	2	206	570	570	2	0	1
23	2	1	2	3	2	206	534	534	2	0	1
24	2	1	2	4	2	206	616	620	2	0	1
25	2	1	2	5	2	206	602	600	2	0	1
26	2	1	2	6	2	206	708	710	1	0	1
27	2	1	2	7	2	206	519	520	2	0	1
28	2	1	2	8	2	206	716	720	1	0	1
1	2	0	1	1	2	206	700	710	2	1	0
2	2	0	1	2	2	206	800		1	1	0
3	2	0	1	3	2	206	700	0	2	1	0
4	2	0	1	4	2	206	700	700	2	1	0
5	2	0	1	5	2	206	700	700	2	1	0
6	2	0	1	6	2	206	700	710	2	1	0
1	2	0	2	1	2	206	800	790	1	1	1
2	2	0	2	2	2	206	800	790	1	1	1
3	2	0	2	3	2	206	700	690	2	1	1
4	2	0	2	4	2	206	800	790	1	1	1
5	2	0	2	5	2	206	700	690	2	1	1
6	2	0	2	6	2	206	800	790	1	1	1
7	2	1	1	1	2	206	700	700	2	1	0
8	2	1	1	2	2	206	800		1	1	0
9	2	1	1	3	2	206	700	710	2	1	0
10	2	1	1	4	2	206	700	710	2	1	0
11	2	1	1	5	2	206	700	720	2	1	0
12	2	1	1	6	2	206	700	700	2	1	0
7	2	1	2	1	2	206	800	790	1	1	1
8	2	1	2	2	2	206	700	700	2	1	1
9	2	1	2	3	2	206	800	790	1	1	1
10	2	1	2	4	2	206	700	700	2	1	1
11	2	1	2	5	2	206	800	790	1	1	1
12	2	1	2	6	2	206	700	700	2	1	1
13	2	0	1	1	2	207	735		1	0	0
14	2	0	1	2	2	207	630	530	1	0	0
15	2	0	1	3	2	207	793		1	0	0
16	2	0	1	4	2	207	541	530	2	0	0
17	2	0	1	5	2	207	742	750	2	0	0
18	2	0	1	6	2	207	502	500	2	0	0
19	2	0	1	7	2	207	702	710	2	0	0
20	2	0	1	8	2	207	540		2	0	0
13	2	0	2	1	2	207	668	720	1	0	1
14	2	0	2	2	2	207	668	720	2	0	1
15	2	0	2	3	2	207	559	600	1	0	1
16	2	0	2	4	2	207	681	700	2	0	1
17	2	0	2	5	2	207	636	650	2	0	1
18	2	0	2	6	2	207	706	750	1	0	1
19	2	0	2	7	2	207	766	800	1	0	1
20	2	0	2	8	2	207	690	730	1	0	1
21	2	1	1	1	2	207	692	490	1	0	0
22	2	1	1	2	2	207	789		1	0	0
23	2	1	1	3	2	207	797	760	1	0	0
24	2	1	1	4	2	207	509		2	0	0
25	2	1	1	5	2	207	526	540	2	0	0
26	2	1	1	6	2	207	607	620	2	0	0
27	2	1	1	7	2	207	643		1	0	0
28	2	1	1	8	2	207	501	500	2	0	0
21	2	1	2	1	2	207	693	690	2	0	1
22	2	1	2	2	2	207	714	710	1	0	1
23	2	1	2	3	2	207	580	580	1	0	1
24	2	1	2	4	2	207	644	650	1	0	1
25	2	1	2	5	2	207	627	630	1	0	1
26	2	1	2	6	2	207	597	600	2	0	1
27	2	1	2	7	2	207	757	750	1	0	1
28	2	1	2	8	2	207	699	700	2	0	1
1	2	0	1	1	2	207	700	610	2	1	0
2	2	0	1	2	2	207	800		1	1	0
3	2	0	1	3	2	207	800		1	1	0
4	2	0	1	4	2	207	700	600	2	1	0
5	2	0	1	5	2	207	700	630	2	1	0
6	2	0	1	6	2	207	700	670	2	1	0
1	2	0	2	1	2	207	700	750	2	1	1
2	2	0	2	2	2	207	700	770	2	1	1
3	2	0	2	3	2	207	700	800	2	1	1
4	2	0	2	4	2	207	800	900	1	1	1
5	2	0	2	5	2	207	800	950	1	1	1
6	2	0	2	6	2	207	800	930	1	1	1
7	2	1	1	1	2	207	700	650	2	1	0
8	2	1	1	2	2	207	700	650	2	1	0
9	2	1	1	3	2	207	700	690	2	1	0
10	2	1	1	4	2	207	700	690	2	1	0
11	2	1	1	5	2	207	700	710	2	1	0
12	2	1	1	6	2	207	800		1	1	0
7	2	1	2	1	2	207	700	750	2	1	1
8	2	1	2	2	2	207	800	900	1	1	1
9	2	1	2	3	2	207	700	780	2	1	1
10	2	1	2	4	2	207	800	930	1	1	1
11	2	1	2	5	2	207	700	790	2	1	1
12	2	1	2	6	2	207	800	890	1	1	1
13	2	0	1	1	2	208	669	710	2	0	0
14	2	0	1	2	2	208	583	630	2	0	0
15	2	0	1	3	2	208	578	610	2	0	0
16	2	0	1	4	2	208	732		1	0	0
17	2	0	1	5	2	208	609		2	0	0
18	2	0	1	6	2	208	791		1	0	0
19	2	0	1	7	2	208	580	610	2	0	0
20	2	0	1	8	2	208	678		1	0	0
13	2	0	2	1	2	208	751	760	1	0	1
14	2	0	2	2	2	208	718	720	2	0	1
15	2	0	2	3	2	208	659	660	1	0	1
16	2	0	2	4	2	208	735	740	2	0	1
17	2	0	2	5	2	208	639	640	2	0	1
18	2	0	2	6	2	208	738	740	1	0	1
19	2	0	2	7	2	208	772	780	1	0	1
20	2	0	2	8	2	208	587	600	2	0	1
21	2	1	1	1	2	208	644		1	0	0
22	2	1	1	2	2	208	783		1	0	0
23	2	1	1	3	2	208	714		1	0	0
24	2	1	1	4	2	208	575	580	2	0	0
25	2	1	1	5	2	208	643	650	2	0	0
26	2	1	1	6	2	208	657		1	0	0
27	2	1	1	7	2	208	590	610	2	0	0
28	2	1	1	8	2	208	630		1	0	0
21	2	1	2	1	2	208	714	720	1	0	1
22	2	1	2	2	2	208	724	730	1	0	1
23	2	1	2	3	2	208	686	790	1	0	1
24	2	1	2	4	2	208	790	790	1	0	1
25	2	1	2	5	2	208	559	560	2	0	1
26	2	1	2	6	2	208	781	790	1	0	1
27	2	1	2	7	2	208	639	790	2	0	1
28	2	1	2	8	2	208	591	600	1	0	1
1	2	0	1	1	2	208	700		2	1	0
2	2	0	1	2	2	208	700		2	1	0
3	2	0	1	3	2	208	800		1	1	0
4	2	0	1	4	2	208	800		1	1	0
5	2	0	1	5	2	208	800		1	1	0
6	2	0	1	6	2	208	700	710	2	1	0
1	2	0	2	1	2	208	800	800	1	1	1
2	2	0	2	2	2	208	700	780	2	1	1
3	2	0	2	3	2	208	700	700	2	1	1
4	2	0	2	4	2	208	700	750	2	1	1
5	2	0	2	5	2	208	700	750	2	1	1
6	2	0	2	6	2	208	800	1000	1	1	1
7	2	1	1	1	2	208	800		1	1	0
8	2	1	1	2	2	208	700	740	2	1	0
9	2	1	1	3	2	208	800		1	1	0
10	2	1	1	4	2	208	800		1	1	0
11	2	1	1	5	2	208	800		1	1	0
12	2	1	1	6	2	208	800		1	1	0
7	2	1	2	1	2	208	800	1000	1	1	1
8	2	1	2	2	2	208	800	1000	1	1	1
9	2	1	2	3	2	208	800	1000	1	1	1
10	2	1	2	4	2	208	800	1000	1	1	1
11	2	1	2	5	2	208	800	1000	1	1	1
12	2	1	2	6	2	208	800	1000	1	1	1
13	2	0	1	1	2	209	779		1	0	0
14	2	0	1	2	2	209	540	520	2	0	0
15	2	0	1	3	2	209	576		1	0	0
16	2	0	1	4	2	209	693	670	2	0	0
17	2	0	1	5	2	209	515	510	2	0	0
18	2	0	1	6	2	209	779		1	0	0
19	2	0	1	7	2	209	689		1	0	0
20	2	0	1	8	2	209	596	610	2	0	0
13	2	0	2	1	2	209	652	652	2	0	1
14	2	0	2	2	2	209	711	711	1	0	1
15	2	0	2	3	2	209	713	713	1	0	1
16	2	0	2	4	2	209	664	688	2	0	1
17	2	0	2	5	2	209	691	691	2	0	1
19	2	0	2	7	2	209	772	772	1	0	1
20	2	0	2	8	2	209	728	720	1	0	1
21	2	1	1	1	2	209	750		1	0	0
22	2	1	1	2	2	209	593		1	0	0
23	2	1	1	3	2	209	523	530	2	0	0
24	2	1	1	4	2	209	589	590	2	0	0
25	2	1	1	5	2	209	515		1	0	0
26	2	1	1	6	2	209	579	590	2	0	0
27	2	1	1	7	2	209	653		1	0	0
28	2	1	1	8	2	209	693		1	0	0
21	2	1	2	1	2	209	595	600	2	0	1
22	2	1	2	2	2	209	720	730	1	0	1
23	2	1	2	3	2	209	768	770	1	0	1
24	2	1	2	4	2	209	724	750	2	0	1
25	2	1	2	5	2	209	693	700	1	0	1
26	2	1	2	6	2	209	546	600	2	0	1
27	2	1	2	7	2	209	749	750	1	0	1
28	2	1	2	8	2	209	721	750	2	0	1
1	2	0	1	1	2	209	700	710	2	1	0
2	2	0	1	2	2	209	800	780	1	1	0
3	2	0	1	3	2	209	700	700	2	1	0
4	2	0	1	4	2	209	800		1	1	0
5	2	0	1	5	2	209	800		1	1	0
6	2	0	1	6	2	209	700	670	2	1	0
1	2	0	2	1	2	209	800	760	1	1	1
2	2	0	2	2	2	209	700	700	2	1	1
3	2	0	2	3	2	209	700	680	2	1	1
4	2	0	2	4	2	209	800	800	1	1	1
5	2	0	2	5	2	209	800	800	1	1	1
6	2	0	2	6	2	209	700	710	2	1	1
7	2	1	1	1	2	209	800	720	1	1	0
8	2	1	1	2	2	209	700	690	2	1	0
9	2	1	1	3	2	209	700	690	2	1	0
10	2	1	1	4	2	209	800	690	1	1	0
11	2	1	1	5	2	209	800	700	1	1	0
12	2	1	1	6	2	209	800	710	1	1	0
7	2	1	2	1	2	209	800	800	1	1	1
8	2	1	2	2	2	209	800	880	1	1	1
9	2	1	2	3	2	209	700	650	2	1	1
10	2	1	2	4	2	209	700	700	2	1	1
11	2	1	2	5	2	209	800	700	1	1	1
12	2	1	2	6	2	209	800	800	1	1	1
13	2	0	1	1	2	210	684	690	2	0	0
14	2	0	1	2	2	210	668		1	0	0
15	2	0	1	3	2	210	559	600	2	0	0
16	2	0	1	4	2	210	681		1	0	0
17	2	0	1	5	2	210	636	630	2	0	0
18	2	0	1	6	2	210	706	700	2	0	0
19	2	0	1	7	2	210	766		1	0	0
20	2	0	1	8	2	210	690		1	0	0
13	2	0	2	1	2	210	788	800	1	0	1
14	2	0	2	2	2	210	682	690	1	0	1
15	2	0	2	3	2	210	536	600	2	0	1
16	2	0	2	4	2	210	618	620	2	0	1
17	2	0	2	5	2	210	714	710	1	0	1
18	2	0	2	6	2	210	535	550	2	0	1
19	2	0	2	7	2	210	693	700	2	0	1
20	2	0	2	8	2	210	776	800	1	0	1
21	2	1	1	1	2	210	608	580	2	0	0
22	2	1	1	2	2	210	775		1	0	0
23	2	1	1	3	2	210	758	770	2	0	0
24	2	1	1	4	2	210	650	630	2	0	0
25	2	1	1	5	2	210	716		1	0	0
26	2	1	1	6	2	210	709	700	2	0	0
27	2	1	1	7	2	210	773		1	0	0
28	2	1	1	8	2	210	766		1	0	0
21	2	1	2	1	2	210	793	800	1	0	1
22	2	1	2	2	2	210	633	640	2	0	1
23	2	1	2	3	2	210	738	740	2	0	1
24	2	1	2	4	2	210	783	790	1	0	1
25	2	1	2	5	2	210	581	590	2	0	1
26	2	1	2	6	2	210	637	640	1	0	1
27	2	1	2	7	2	210	668	670	2	0	1
28	2	1	2	8	2	210	765	770	1	0	1
1	2	0	1	1	2	210	800		1	1	0
2	2	0	1	2	2	210	800		1	1	0
3	2	0	1	3	2	210	800		1	1	0
4	2	0	1	4	2	210	800		1	1	0
5	2	0	1	5	2	210	700	600	2	1	0
6	2	0	1	6	2	210	800		1	1	0
1	2	0	2	1	2	210	700	710	2	1	1
2	2	0	2	2	2	210	800	800	1	1	1
3	2	0	2	3	2	210	800	800	1	1	1
4	2	0	2	4	2	210	700	780	2	1	1
5	2	0	2	5	2	210	700	760	2	1	1
6	2	0	2	6	2	210	700	760	2	1	1
7	2	1	1	1	2	210	700	720	2	1	0
8	2	1	1	2	2	210	800		1	1	0
9	2	1	1	3	2	210	800		1	1	0
10	2	1	1	4	2	210	700	690	2	1	0
11	2	1	1	5	2	210	700	700	2	1	0
12	2	1	1	6	2	210	700	710	2	1	0
7	2	1	2	1	2	210	700	760	2	1	1
8	2	1	2	2	2	210	700	780	2	1	1
9	2	1	2	3	2	210	800	800	1	1	1
10	2	1	2	4	2	210	800	800	1	1	1
11	2	1	2	5	2	210	700	720	2	1	1
12	2	1	2	6	2	210	700	720	2	1	1
13	2	0	1	1	2	211	652	640	2	0	0
14	2	0	1	2	2	211	682		1	0	0
15	2	0	1	3	2	211	536	530	2	0	0
16	2	0	1	4	2	211	618	610	2	0	0
17	2	0	1	5	2	211	714		1	0	0
18	2	0	1	6	2	211	535	520	2	0	0
19	2	0	1	7	2	211	693	690	1	0	0
20	2	0	1	8	2	211	776		1	0	0
13	2	0	2	1	2	211	735	730	1	0	1
14	2	0	2	2	2	211	530	530	1	0	1
15	2	0	2	3	2	211	527	520	2	0	1
16	2	0	2	4	2	211	739	730	1	0	1
17	2	0	2	5	2	211	664	660	1	0	1
18	2	0	2	6	2	211	756	750	2	0	1
19	2	0	2	7	2	211	788	780	1	0	1
20	2	0	2	8	2	211	673	670	2	0	1
21	2	1	1	1	2	211	697	610	2	0	0
22	2	1	1	2	2	211	585	590	2	0	0
23	2	1	1	3	2	211	587		1	0	0
24	2	1	1	4	2	211	756		1	0	0
25	2	1	1	5	2	211	512	510	2	0	0
26	2	1	1	6	2	211	630		1	0	0
27	2	1	1	7	2	211	534	520	2	0	0
28	2	1	1	8	2	211	551	560	2	0	0
21	2	1	2	1	2	211	797	800	1	0	1
22	2	1	2	2	2	211	680	690	2	0	1
23	2	1	2	3	2	211	664	690	1	0	1
24	2	1	2	4	2	211	778	800	1	0	1
25	2	1	2	5	2	211	558	570	1	0	1
26	2	1	2	6	2	211	548	580	2	0	1
27	2	1	2	7	2	211	757	780	1	0	1
28	2	1	2	8	2	211	658	650	2	0	1
1	2	0	1	1	2	211	800		1	1	0
2	2	0	1	2	2	211	700	770	2	1	0
3	2	0	1	3	2	211	700	780	2	1	0
4	2	0	1	4	2	211	700	750	2	1	0
5	2	0	1	5	2	211	700	740	2	1	0
6	2	0	1	6	2	211	800		1	1	0
1	2	0	2	1	2	211	700	700	2	1	1
2	2	0	2	2	2	211	700	700	2	1	1
3	2	0	2	3	2	211	800	810	1	1	1
4	2	0	2	4	2	211	800	800	1	1	1
5	2	0	2	5	2	211	800	880	1	1	1
6	2	0	2	6	2	211	700	700	2	1	1
7	2	1	1	1	2	211	800		1	1	0
8	2	1	1	2	2	211	800		1	1	0
9	2	1	1	3	2	211	700		2	1	0
10	2	1	1	4	2	211	700	710	2	1	0
11	2	1	1	5	2	211	800		1	1	0
12	2	1	1	6	2	211	800		1	1	0
7	2	1	2	1	2	211	800	800	1	1	1
8	2	1	2	2	2	211	800	790	1	1	1
9	2	1	2	3	2	211	800	800	1	1	1
10	2	1	2	4	2	211	800	800	1	1	1
11	2	1	2	5	2	211	800	800	1	1	1
12	2	1	2	6	2	211	800	800	1	1	1
1	2	0	2	1	5	500	700	700	2	1	1
2	2	0	2	2	5	500	700	700	2	1	1
3	2	0	2	3	5	500	700	700	2	1	1
4	2	0	2	4	5	500	800	800	1	1	1
5	2	0	2	5	5	500	800	800	1	1	1
6	2	0	2	6	5	500	800	800	1	1	1
7	2	0	2	7	5	500	800	800	1	1	1
8	2	0	2	8	5	500	700	700	2	1	1
9	2	1	2	1	5	500	800	710	1	1	1
10	2	1	2	2	5	500	800	710	1	1	1
11	2	1	2	3	5	500	700	700	2	1	1
12	2	1	2	4	5	500	700	700	2	1	1
13	2	1	2	5	5	500	800	710	1	1	1
14	2	1	2	6	5	500	800	800	1	1	1
15	2	1	2	7	5	500	700	700	2	1	1
16	2	1	2	8	5	500	700	700	2	1	1
1	2	0	2	1	5	501	700	750	2	1	1
2	2	0	2	2	5	501	800	800	1	1	1
3	2	0	2	3	5	501	800	800	1	1	1
4	2	0	2	4	5	501	800	850	1	1	1
5	2	0	2	5	5	501	800	850	1	1	1
6	2	0	2	6	5	501	800	850	1	1	1
7	2	0	2	7	5	501	700	800	2	1	1
8	2	0	2	8	5	501	800	840	1	1	1
9	2	1	2	1	5	501	800	840	1	1	1
10	2	1	2	2	5	501	800	800	1	1	1
11	2	1	2	3	5	501	800	850	1	1	1
12	2	1	2	4	5	501	700	750	2	1	1
13	2	1	2	5	5	501	800	800	1	1	1
14	2	1	2	6	5	501	700	800	2	1	1
15	2	1	2	7	5	501	800	850	1	1	1
16	2	1	2	8	5	501	700	790	2	1	1
1	2	0	2	1	5	502	800	850	1	1	1
2	2	0	2	2	5	502	800	850	1	1	1
3	2	0	2	3	5	502	700	740	2	1	1
4	2	0	2	4	5	502	800	850	1	1	1
5	2	0	2	5	5	502	700	750	2	1	1
6	2	0	2	6	5	502	700	750	2	1	1
7	2	0	2	7	5	502	700	750	2	1	1
8	2	0	2	8	5	502	700	750	2	1	1
9	2	1	2	1	5	502	700	720	2	1	1
10	2	1	2	2	5	502	700	750	2	1	1
11	2	1	2	3	5	502	700	750	2	1	1
12	2	1	2	4	5	502	800	850	1	1	1
13	2	1	2	5	5	502	700	750	2	1	1
14	2	1	2	6	5	502	700	750	2	1	1
15	2	1	2	7	5	502	700	720	2	1	1
16	2	1	2	8	5	502	800	850	1	1	1
1	2	0	2	1	5	503	700	750	2	1	1
2	2	0	2	2	5	503	800	800	1	1	1
3	2	0	2	3	5	503	800	900	1	1	1
4	2	0	2	4	5	503	700	780	2	1	1
5	2	0	2	5	5	503	700	750	2	1	1
6	2	0	2	6	5	503	800	900	1	1	1
7	2	0	2	7	5	503	800	850	1	1	1
8	2	0	2	8	5	503	800	850	1	1	1
9	2	1	2	1	5	503	800	850	1	1	1
10	2	1	2	2	5	503	800	850	1	1	1
11	2	1	2	3	5	503	800	850	1	1	1
12	2	1	2	4	5	503	700	750	2	1	1
13	2	1	2	5	5	503	700	790	2	1	1
14	2	1	2	6	5	503	700	790	2	1	1
15	2	1	2	7	5	503	800	790	1	1	1
16	2	1	2	8	5	503	800	750	1	1	1
1	2	0	2	1	5	504	800	800	1	1	1
2	2	0	2	2	5	504	700	700	2	1	1
3	2	0	2	3	5	504	800	800	1	1	1
4	2	0	2	4	5	504	800	800	1	1	1
5	2	0	2	5	5	504	800	800	1	1	1
6	2	0	2	6	5	504	800	710	1	1	1
7	2	0	2	7	5	504	800	710	1	1	1
8	2	0	2	8	5	504	700	700	2	1	1
9	2	1	2	1	5	504	700	700	2	1	1
10	2	1	2	2	5	504	800	710	1	1	1
11	2	1	2	3	5	504	800	710	1	1	1
12	2	1	2	4	5	504	800	710	1	1	1
13	2	1	2	5	5	504	800	710	1	1	1
14	2	1	2	6	5	504	700	700	2	1	1
15	2	1	2	7	5	504	800	800	1	1	1
16	2	1	2	8	5	504	800	710	1	1	1
1	2	0	2	1	5	505	700	700	2	1	1
2	2	0	2	2	5	505	700	700	2	1	1
3	2	0	2	3	5	505	700	790	2	1	1
4	2	0	2	4	5	505	800	800	1	1	1
5	2	0	2	5	5	505	700	740	2	1	1
6	2	0	2	6	5	505	700	790	2	1	1
7	2	0	2	7	5	505	800	800	1	1	1
8	2	0	2	8	5	505	800	800	1	1	1
9	2	1	2	1	5	505	700	700	2	1	1
10	2	1	2	2	5	505	700	700	2	1	1
11	2	1	2	3	5	505	700	700	2	1	1
12	2	1	2	4	5	505	800	800	1	1	1
13	2	1	2	5	5	505	700	790	2	1	1
14	2	1	2	6	5	505	800	800	1	1	1
15	2	1	2	7	5	505	700	790	2	1	1
16	2	1	2	8	5	505	800	800	1	1	1
1	2	0	2	1	5	506	700	700	2	1	1
2	2	0	2	2	5	506	800	800	1	1	1
3	2	0	2	3	5	506	700	700	2	1	1
4	2	0	2	4	5	506	700	700	2	1	1
5	2	0	2	5	5	506	800	800	1	1	1
6	2	0	2	6	5	506	700	700	2	1	1
7	2	0	2	7	5	506	800	800	1	1	1
8	2	0	2	8	5	506	800	800	1	1	1
9	2	1	2	1	5	506	700	700	2	1	1
10	2	1	2	2	5	506	700	700	2	1	1
11	2	1	2	3	5	506	800	800	1	1	1
12	2	1	2	4	5	506	800	800	1	1	1
13	2	1	2	5	5	506	800	800	1	1	1
14	2	1	2	6	5	506	700	710	2	1	1
15	2	1	2	7	5	506	700	750	2	1	1
16	2	1	2	8	5	506	800	800	1	1	1
1	2	0	2	1	5	507	800		1	1	1
2	2	0	2	2	5	507	700	700	2	1	1
3	2	0	2	3	5	507	800	800	1	1	1
4	2	0	2	4	5	507	700	790	2	1	1
5	2	0	2	5	5	507	700	750	2	1	1
6	2	0	2	6	5	507	700	750	2	1	1
7	2	0	2	7	5	507	700	700	2	1	1
8	2	0	2	8	5	507	700	790	2	1	1
9	2	1	2	1	5	507	800	800	1	1	1
10	2	1	2	2	5	507	700	730	2	1	1
11	2	1	2	3	5	507	700	710	2	1	1
12	2	1	2	4	5	507	700	790	2	1	1
13	2	1	2	5	5	507	700	790	2	1	1
14	2	1	2	6	5	507	800	780	1	1	1
15	2	1	2	7	5	507	700	790	2	1	1
16	2	1	2	8	5	507	700	790	2	1	1
1	2	0	2	1	5	508	800	750	1	1	1
2	2	0	2	2	5	508	700	730	2	1	1
3	2	0	2	3	5	508	700	740	2	1	1
4	2	0	2	4	5	508	700	740	2	1	1
5	2	0	2	5	5	508	700	760	2	1	1
6	2	0	2	6	5	508	700	760	2	1	1
7	2	0	2	7	5	508	800	800	1	1	1
8	2	0	2	8	5	508	800	710	1	1	1
9	2	1	2	1	5	508	800	800	1	1	1
10	2	1	2	2	5	508	800	800	1	1	1
11	2	1	2	3	5	508	700	750	2	1	1
12	2	1	2	4	5	508	700	750	2	1	1
13	2	1	2	5	5	508	700	700	2	1	1
14	2	1	2	6	5	508	800	740	1	1	1
15	2	1	2	7	5	508	800	800	1	1	1
16	2	1	2	8	5	508	700	700	2	1	1
1	2	0	2	1	5	509	700	700	2	1	1
2	2	0	2	2	5	509	800	700	1	1	1
3	2	0	2	3	5	509	800	720	1	1	1
4	2	0	2	4	5	509	700	700	2	1	1
5	2	0	2	5	5	509	800	750	1	1	1
6	2	0	2	6	5	509	800	710	1	1	1
7	2	0	2	7	5	509	700	700	2	1	1
8	2	0	2	8	5	509	700	700	2	1	1
9	2	1	2	1	5	509	700	700	2	1	1
10	2	1	2	2	5	509	700	700	2	1	1
11	2	1	2	3	5	509	800	760	1	1	1
12	2	1	2	4	5	509	800	730	1	1	1
13	2	1	2	5	5	509	700	700	2	1	1
14	2	1	2	6	5	509	700	710	2	1	1
15	2	1	2	7	5	509	800	770	1	1	1
16	2	1	2	8	5	509	800	770	1	1	1
1	2	0	2	1	5	510	800	800	1	1	1
2	2	0	2	2	5	510	700	730	2	1	1
3	2	0	2	3	5	510	700	700	2	1	1
4	2	0	2	4	5	510	800	810	1	1	1
5	2	0	2	5	5	510	700	750	2	1	1
6	2	0	2	6	5	510	700	750	2	1	1
7	2	0	2	7	5	510	700	700	2	1	1
8	2	0	2	8	5	510	700	710	2	1	1
9	2	1	2	1	5	510	800	810	1	1	1
10	2	1	2	2	5	510	800	810	1	1	1
11	2	1	2	3	5	510	800	810	1	1	1
12	2	1	2	4	5	510	700	720	2	1	1
13	2	1	2	5	5	510	800	810	1	1	1
14	2	1	2	6	5	510	800	810	1	1	1
15	2	1	2	7	5	510	800	810	1	1	1
16	2	1	2	8	5	510	700	790	2	1	1
1	2	0	2	1	5	511	800	500	1	1	1
2	2	0	2	2	5	511	800	600	1	1	1
3	2	0	2	3	5	511	800	750	1	1	1
4	2	0	2	4	5	511	700	650	2	1	1
5	2	0	2	5	5	511	800	750	1	1	1
6	2	0	2	6	5	511	800	770	1	1	1
7	2	0	2	7	5	511	700	670	2	1	1
8	2	0	2	8	5	511	800	750	1	1	1
9	2	1	2	1	5	511	700	550	2	1	1
10	2	1	2	2	5	511	700	670	2	1	1
11	2	1	2	3	5	511	700	700	2	1	1
12	2	1	2	4	5	511	800	800	1	1	1
13	2	1	2	5	5	511	800	700	1	1	1
14	2	1	2	6	5	511	800	750	1	1	1
15	2	1	2	7	5	511	700	700	2	1	1
16	2	1	2	8	5	511	700	750	2	1	1
1	2	0	2	1	6	600	700	700	2	1	1
2	2	0	2	2	6	600	700	700	2	1	1
3	2	0	2	3	6	600	700	700	2	1	1
4	2	0	2	4	6	600	800	800	1	1	1
5	2	0	2	5	6	600	800	800	1	1	1
6	2	0	2	6	6	600	800	800	1	1	1
7	2	0	2	7	6	600	700	700	2	1	1
8	2	0	2	8	6	600	800	800	1	1	1
9	2	1	2	1	6	600	800	800	1	1	1
10	2	1	2	2	6	600	800	710	1	1	1
11	2	1	2	3	6	600	700	700	2	1	1
12	2	1	2	4	6	600	800	800	1	1	1
13	2	1	2	5	6	600	700	700	2	1	1
14	2	1	2	6	6	600	700	700	2	1	1
15	2	1	2	7	6	600	800	800	1	1	1
16	2	1	2	8	6	600	700	710	2	1	1
1	2	0	2	1	6	601	800	800	1	1	1
2	2	0	2	2	6	601	700	700	2	1	1
3	2	0	2	3	6	601	700	700	2	1	1
4	2	0	2	4	6	601	700	700	2	1	1
5	2	0	2	5	6	601	800	800	1	1	1
6	2	0	2	6	6	601	800	800	1	1	1
7	2	0	2	7	6	601	800	800	1	1	1
8	2	0	2	8	6	601	800	800	1	1	1
9	2	1	2	1	6	601	800	800	1	1	1
10	2	1	2	2	6	601	800	800	1	1	1
11	2	1	2	3	6	601	800	770	1	1	1
12	2	1	2	4	6	601	800	770	1	1	1
13	2	1	2	5	6	601	700	760	2	1	1
14	2	1	2	6	6	601	800	730	1	1	1
15	2	1	2	7	6	601	700	720	2	1	1
16	2	1	2	8	6	601	800	800	1	1	1
1	2	0	2	1	6	602	700	780	2	1	1
2	2	0	2	2	6	602	800	800	1	1	1
3	2	0	2	3	6	602	700	790	2	1	1
4	2	0	2	4	6	602	800	800	1	1	1
5	2	0	2	5	6	602	800	800	1	1	1
6	2	0	2	6	6	602	800	800	1	1	1
7	2	0	2	7	6	602	700	790	2	1	1
8	2	0	2	8	6	602	800	800	1	1	1
9	2	1	2	1	6	602	800	800	1	1	1
10	2	1	2	2	6	602	700	790	2	1	1
11	2	1	2	3	6	602	800	790	1	1	1
12	2	1	2	4	6	602	800	800	1	1	1
13	2	1	2	5	6	602	800	800	1	1	1
14	2	1	2	6	6	602	700	780	2	1	1
15	2	1	2	7	6	602	700	780	2	1	1
16	2	1	2	8	6	602	700	790	2	1	1
1	2	0	2	1	6	603	800	850	1	1	1
2	2	0	2	2	6	603	800	850	1	1	1
3	2	0	2	3	6	603	800	850	1	1	1
4	2	0	2	4	6	603	700	790	2	1	1
5	2	0	2	5	6	603	700	780	2	1	1
6	2	0	2	6	6	603	800	780	1	1	1
7	2	0	2	7	6	603	800	840	1	1	1
8	2	0	2	8	6	603	700	780	2	1	1
9	2	1	2	1	6	603	700	780	2	1	1
10	2	1	2	2	6	603	700	790	2	1	1
11	2	1	2	3	6	603	700	770	2	1	1
12	2	1	2	4	6	603	700	750	2	1	1
13	2	1	2	5	6	603	800	840	1	1	1
14	2	1	2	6	6	603	700	780	2	1	1
15	2	1	2	7	6	603	800	830	1	1	1
16	2	1	2	8	6	603	700	790	2	1	1
1	2	0	2	1	6	604	700	760	2	1	1
2	2	0	2	2	6	604	800	790	1	1	1
3	2	0	2	3	6	604	700	760	2	1	1
4	2	0	2	4	6	604	700	750	2	1	1
5	2	0	2	5	6	604	700	730	2	1	1
6	2	0	2	6	6	604	700	740	2	1	1
7	2	0	2	7	6	604	800	790	1	1	1
8	2	0	2	8	6	604	700	740	2	1	1
9	2	1	2	1	6	604	800	770	1	1	1
10	2	1	2	2	6	604	800	790	1	1	1
11	2	1	2	3	6	604	800	760	1	1	1
12	2	1	2	4	6	604	800	770	1	1	1
13	2	1	2	5	6	604	800	790	1	1	1
14	2	1	2	6	6	604	800	800	1	1	1
15	2	1	2	7	6	604	700	760	2	1	1
16	2	1	2	8	6	604	800	800	1	1	1
1	2	0	2	1	6	605	800	900	1	1	1
2	2	0	2	2	6	605	800	900	1	1	1
3	2	0	2	3	6	605	700	780	2	1	1
4	2	0	2	4	6	605	700	780	2	1	1
5	2	0	2	5	6	605	700	790	2	1	1
6	2	0	2	6	6	605	800	890	1	1	1
7	2	0	2	7	6	605	700	790	2	1	1
8	2	0	2	8	6	605	700	790	2	1	1
9	2	1	2	1	6	605	700	720	2	1	1
10	2	1	2	2	6	605	700	720	2	1	1
11	2	1	2	3	6	605	700	720	2	1	1
12	2	1	2	4	6	605	700	710	2	1	1
13	2	1	2	5	6	605	800	900	1	1	1
14	2	1	2	6	6	605	800	900	1	1	1
15	2	1	2	7	6	605	800	900	1	1	1
16	2	1	2	8	6	605	700	700	2	1	1
1	2	0	2	1	6	606	800	850	1	1	1
2	2	0	2	2	6	606	800	810	1	1	1
3	2	0	2	3	6	606	800	800	1	1	1
4	2	0	2	4	6	606	700	700	2	1	1
5	2	0	2	5	6	606	700	700	2	1	1
6	2	0	2	6	6	606	700	700	2	1	1
7	2	0	2	7	6	606	800	800	1	1	1
8	2	0	2	8	6	606	700	700	2	1	1
9	2	1	2	1	6	606	800	800	1	1	1
10	2	1	2	2	6	606	700	750	2	1	1
11	2	1	2	3	6	606	700	750	2	1	1
12	2	1	2	4	6	606	800	800	1	1	1
13	2	1	2	5	6	606	800	800	1	1	1
14	2	1	2	6	6	606	800	700	1	1	1
15	2	1	2	7	6	606	700	700	2	1	1
16	2	1	2	8	6	606	700	710	2	1	1
1	2	0	2	1	6	607	700	790	2	1	1
2	2	0	2	2	6	607	700	790	2	1	1
3	2	0	2	3	6	607	700	700	2	1	1
4	2	0	2	4	6	607	800	790	1	1	1
5	2	0	2	5	6	607	700	790	2	1	1
6	2	0	2	6	6	607	700	790	2	1	1
7	2	0	2	7	6	607	800	700	1	1	1
8	2	0	2	8	6	607	700	790	2	1	1
9	2	1	2	1	6	607	700	790	2	1	1
10	2	1	2	2	6	607	800	700	1	1	1
11	2	1	2	3	6	607	700	700	2	1	1
12	2	1	2	4	6	607	700	700	2	1	1
13	2	1	2	5	6	607	700	700	2	1	1
14	2	1	2	6	6	607	800	700	1	1	1
15	2	1	2	7	6	607	800	700	1	1	1
16	2	1	2	8	6	607	800	800	1	1	1
1	2	0	2	1	6	608	800	1000	1	1	1
2	2	0	2	2	6	608	800	840	1	1	1
3	2	0	2	3	6	608	800	840	1	1	1
4	2	0	2	4	6	608	800	750	1	1	1
5	2	0	2	5	6	608	800	850	1	1	1
6	2	0	2	6	6	608	800	900	1	1	1
7	2	0	2	7	6	608	700	900	2	1	1
8	2	0	2	8	6	608	800	900	1	1	1
9	2	1	2	1	6	608	700	740	2	1	1
10	2	1	2	2	6	608	800	850	1	1	1
11	2	1	2	3	6	608	800	850	1	1	1
12	2	1	2	4	6	608	700	760	2	1	1
13	2	1	2	5	6	608	700	790	2	1	1
14	2	1	2	6	6	608	700	750	2	1	1
15	2	1	2	7	6	608	800	900	1	1	1
16	2	1	2	8	6	608	800	880	1	1	1
1	2	0	2	1	6	609	800	710	1	1	1
2	2	0	2	2	6	609	700	720	2	1	1
3	2	0	2	3	6	609	800	700	1	1	1
4	2	0	2	4	6	609	800	750	1	1	1
5	2	0	2	5	6	609	700	700	2	1	1
6	2	0	2	6	6	609	700	730	2	1	1
7	2	0	2	7	6	609	800	800	1	1	1
8	2	0	2	8	6	609	800	800	1	1	1
9	2	1	2	1	6	609	700	760	2	1	1
10	2	1	2	2	6	609	700	770	2	1	1
11	2	1	2	3	6	609	700	790	2	1	1
12	2	1	2	4	6	609	700	790	2	1	1
13	2	1	2	5	6	609	700	750	2	1	1
14	2	1	2	6	6	609	700	780	2	1	1
15	2	1	2	7	6	609	800	800	1	1	1
16	2	1	2	8	6	609	700	790	2	1	1
1	2	0	2	1	6	610	700	790	2	1	1
2	2	0	2	2	6	610	700	760	2	1	1
3	2	0	2	3	6	610	800	800	1	1	1
4	2	0	2	4	6	610	700	800	2	1	1
5	2	0	2	5	6	610	800	820	1	1	1
6	2	0	2	6	6	610	700	820	2	1	1
7	2	0	2	7	6	610	700	780	2	1	1
8	2	0	2	8	6	610	800	710	1	1	1
9	2	1	2	1	6	610	700	780	2	1	1
10	2	1	2	2	6	610	700	780	2	1	1
11	2	1	2	3	6	610	800	770	1	1	1
12	2	1	2	4	6	610	700	750	2	1	1
13	2	1	2	5	6	610	800	850	1	1	1
14	2	1	2	6	6	610	800	850	1	1	1
15	2	1	2	7	6	610	700	790	2	1	1
16	2	1	2	8	6	610	800	810	1	1	1
1	2	0	2	1	6	611	700	750	2	1	1
2	2	0	2	2	6	611	700	740	2	1	1
3	2	0	2	3	6	611	800	800	1	1	1
4	2	0	2	4	6	611	800	800	1	1	1
5	2	0	2	5	6	611	800	800	1	1	1
6	2	0	2	6	6	611	700	750	2	1	1
7	2	0	2	7	6	611	700	750	2	1	1
8	2	0	2	8	6	611	700	750	2	1	1
9	2	1	2	1	6	611	800	800	1	1	1
10	2	1	2	2	6	611	800	800	1	1	1
11	2	1	2	3	6	611	800	800	1	1	1
12	2	1	2	4	6	611	800	800	1	1	1
13	2	1	2	5	6	611	700	700	2	1	1
14	2	1	2	6	6	611	700	710	2	1	1
15	2	1	2	7	6	611	700	720	2	1	1
16	2	1	2	8	6	611	800	800	1	1	1
1	2	0	2	1	7	700	800	790	1	1	1
2	2	0	2	2	7	700	700	700	2	1	1
3	2	0	2	3	7	700	700	700	2	1	1
4	2	0	2	4	7	700	800	810	1	1	1
5	2	0	2	5	7	700	800	810	1	1	1
6	2	1	2	1	7	700	700	790	2	1	1
7	2	1	2	2	7	700	700	790	2	1	1
8	2	1	2	3	7	700	700	790	2	1	1
9	2	1	2	4	7	700	700	790	2	1	1
10	2	1	2	5	7	700	800	810	1	1	1
11	2	1	2	6	7	700	700	700	2	1	1
12	2	1	2	7	7	700	800	690	1	1	1
1	2	0	2	1	7	701	700	700	2	1	1
2	2	0	2	2	7	701	800	800	1	1	1
3	2	0	2	3	7	701	800	800	1	1	1
4	2	0	2	4	7	701	700	700	2	1	1
5	2	0	2	5	7	701	700	700	2	1	1
6	2	1	2	1	7	701	800	800	1	1	1
7	2	1	2	2	7	701	800	800	1	1	1
8	2	1	2	3	7	701	800	800	1	1	1
9	2	1	2	4	7	701	800	780	1	1	1
10	2	1	2	5	7	701	700	700	2	1	1
11	2	1	2	6	7	701	800	800	1	1	1
12	2	1	2	7	7	701	700	700	2	1	1
1	2	0	2	1	7	702	700	700	2	1	1
2	2	0	2	2	7	702	800	800	1	1	1
3	2	0	2	3	7	702	700	750	2	1	1
4	2	0	2	4	7	702	800	850	1	1	1
5	2	0	2	5	7	702	800	850	1	1	1
6	2	1	2	1	7	702	700	750	2	1	1
7	2	1	2	2	7	702	700	750	2	1	1
8	2	1	2	3	7	702	800	850	1	1	1
9	2	1	2	4	7	702	700	780	2	1	1
10	2	1	2	5	7	702	800	850	1	1	1
11	2	1	2	6	7	702	800	850	1	1	1
12	2	1	2	7	7	702	800	850	1	1	1
1	2	0	2	1	7	703	800	700	1	1	1
2	2	0	2	2	7	703	700	690	2	1	1
3	2	0	2	3	7	703	700	540	2	1	1
4	2	0	2	4	7	703	700	700	2	1	1
5	2	0	2	5	7	703	700	690	2	1	1
6	2	1	2	1	7	703	800	710	1	1	1
7	2	1	2	2	7	703	700	700	2	1	1
8	2	1	2	3	7	703	800	750	1	1	1
9	2	1	2	4	7	703	700	700	2	1	1
10	2	1	2	5	7	703	700	700	2	1	1
11	2	1	2	6	7	703	800	790	1	1	1
12	2	1	2	7	7	703	700	700	2	1	1
1	2	0	2	1	7	704	700	990	2	1	1
2	2	0	2	2	7	704	800	1990	1	1	1
3	2	0	2	3	7	704	800	1990	1	1	1
4	2	0	2	4	7	704	700	700	2	1	1
5	2	0	2	5	7	704	800	1990	1	1	1
6	2	1	2	1	7	704	800	2990	1	1	1
7	2	1	2	2	7	704	700	700	2	1	1
8	2	1	2	3	7	704	800	1990	1	1	1
9	2	1	2	4	7	704	800	1890	1	1	1
10	2	1	2	5	7	704	700	700	2	1	1
11	2	1	2	6	7	704	700	700	2	1	1
12	2	1	2	7	7	704	700	700	2	1	1
1	2	0	2	1	7	705	700	690	2	1	1
2	2	0	2	2	7	705	700	700	2	1	1
3	2	0	2	3	7	705	800	750	1	1	1
4	2	0	2	4	7	705	800	730	1	1	1
5	2	0	2	5	7	705	700	700	2	1	1
6	2	1	2	1	7	705	700	700	2	1	1
7	2	1	2	2	7	705	700	700	2	1	1
8	2	1	2	3	7	705	700	700	2	1	1
9	2	1	2	4	7	705	800	750	1	1	1
10	2	1	2	5	7	705	700	760	2	1	1
11	2	1	2	6	7	705	700	700	2	1	1
12	2	1	2	7	7	705	700	710	2	1	1
1	2	0	2	1	7	706	800	680	1	1	1
2	2	0	2	2	7	706	800	720	1	1	1
3	2	0	2	3	7	706	700	690	2	1	1
4	2	0	2	4	7	706	700	640	2	1	1
5	2	0	2	5	7	706	700	690	2	1	1
6	2	1	2	1	7	706	800	800	1	1	1
7	2	1	2	2	7	706	700	690	2	1	1
8	2	1	2	3	7	706	800	760	1	1	1
9	2	1	2	4	7	706	800	780	1	1	1
10	2	1	2	5	7	706	800	800	1	1	1
11	2	1	2	6	7	706	700	780	2	1	1
12	2	1	2	7	7	706	800	780	1	1	1
1	2	0	2	1	7	707	800	800	1	1	1
2	2	0	2	2	7	707	700	690	2	1	1
3	2	0	2	3	7	707	800	780	1	1	1
4	2	0	2	4	7	707	700	700	2	1	1
5	2	0	2	5	7	707	800	790	1	1	1
6	2	1	2	1	7	707	700	700	2	1	1
7	2	1	2	2	7	707	800	790	1	1	1
8	2	1	2	3	7	707	700	700	2	1	1
9	2	1	2	4	7	707	800	790	1	1	1
10	2	1	2	5	7	707	800	790	1	1	1
11	2	1	2	6	7	707	700	700	2	1	1
12	2	1	2	7	7	707	800	790	1	1	1
1	2	0	2	1	7	708	700	750	2	1	1
2	2	0	2	2	7	708	700	770	2	1	1
3	2	0	2	3	7	708	800	800	1	1	1
4	2	0	2	4	7	708	800	800	1	1	1
5	2	0	2	5	7	708	700	790	2	1	1
6	2	1	2	1	7	708	800	800	1	1	1
7	2	1	2	2	7	708	800	800	1	1	1
8	2	1	2	3	7	708	700	790	2	1	1
9	2	1	2	4	7	708	800	800	1	1	1
10	2	1	2	5	7	708	700	790	2	1	1
11	2	1	2	6	7	708	700	790	2	1	1
12	2	1	2	7	7	708	700	790	2	1	1
1	2	0	2	1	7	709	700	700	2	1	1
2	2	0	2	2	7	709	800	790	1	1	1
3	2	0	2	3	7	709	700	700	2	1	1
4	2	0	2	4	7	709	800	800	1	1	1
5	2	0	2	5	7	709	800	800	1	1	1
6	2	1	2	1	7	709	700	780	2	1	1
7	2	1	2	2	7	709	800	800	1	1	1
8	2	1	2	3	7	709	700	750	2	1	1
9	2	1	2	4	7	709	700	720	2	1	1
10	2	1	2	5	7	709	800	790	1	1	1
11	2	1	2	6	7	709	800	790	1	1	1
12	2	1	2	7	7	709	800	790	1	1	1
1	2	0	2	1	7	710	800	780	1	1	1
2	2	0	2	2	7	710	700	720	2	1	1
3	2	0	2	3	7	710	700	700	2	1	1
4	2	0	2	4	7	710	700	740	2	1	1
5	2	0	2	5	7	710	800	820	1	1	1
6	2	1	2	1	7	710	700	730	2	1	1
7	2	1	2	2	7	710	800	830	1	1	1
8	2	1	2	3	7	710	700	740	2	1	1
9	2	1	2	4	7	710	700	720	2	1	1
10	2	1	2	5	7	710	700	760	2	1	1
11	2	1	2	6	7	710	800	850	1	1	1
12	2	1	2	7	7	710	700	770	2	1	1
1	2	0	2	1	7	711	800	950	1	1	1
2	2	0	2	2	7	711	800	1200	1	1	1
3	2	0	2	3	7	711	800	820	1	1	1
4	2	0	2	4	7	711	800	850	1	1	1
5	2	0	2	5	7	711	700	750	2	1	1
6	2	1	2	1	7	711	800	850	1	1	1
7	2	1	2	2	7	711	800	900	1	1	1
8	2	1	2	3	7	711	800	850	1	1	1
9	2	1	2	4	7	711	700	1000	2	1	1
10	2	1	2	5	7	711	800	800	1	1	1
11	2	1	2	6	7	711	800	850	1	1	1
12	2	1	2	7	7	711	800	900	1	1	1
13	2	0	1	1	8	800	737		1	0	0
14	2	0	1	2	8	800	519	560	2	0	0
15	2	0	1	3	8	800	718	750	2	0	0
16	2	0	1	4	8	800	547	560	2	0	0
17	2	0	1	5	8	800	533		1	0	0
18	2	0	1	6	8	800	588	600	2	0	0
19	2	0	1	7	8	800	718		1	0	0
13	2	0	2	1	8	800	671	670	1	0	1
14	2	0	2	2	8	800	598	598	2	0	1
15	2	0	2	3	8	800	650	645	1	0	1
16	2	0	2	4	8	800	672	672	1	0	1
17	2	0	2	5	8	800	521	521	2	0	1
18	2	0	2	6	8	800	728	728	1	0	1
19	2	0	2	7	8	800	731	731	1	0	1
20	2	1	1	1	8	800	697		1	0	0
21	2	1	1	2	8	800	542		2	0	0
22	2	1	1	3	8	800	615	620	2	0	0
23	2	1	1	4	8	800	721		1	0	0
24	2	1	1	5	8	800	641	650	2	0	0
25	2	1	1	6	8	800	599	620	2	0	0
26	2	1	1	7	8	800	683		2	0	0
27	2	1	1	8	8	800	654	670	2	0	0
28	2	1	1	9	8	800	540	550	2	0	0
20	2	1	2	1	8	800	523	523	2	0	1
21	2	1	2	2	8	800	545	545	2	0	1
22	2	1	2	3	8	800	712	712	2	0	1
23	2	1	2	4	8	800	665	665	1	0	1
24	2	1	2	5	8	800	590	590	2	0	1
25	2	1	2	6	8	800	777	800	1	0	1
26	2	1	2	7	8	800	753	800	1	0	1
27	2	1	2	8	8	800	624	650	1	0	1
28	2	1	2	9	8	800	536	560	2	0	1
1	2	0	1	1	8	800	700	780	2	1	0
2	2	0	1	2	8	800	800		1	1	0
3	2	0	1	3	8	800	700	770	2	1	0
4	2	0	1	4	8	800	800		1	1	0
5	2	0	1	5	8	800	800		1	1	0
1	2	0	2	1	8	800	700	750	2	1	1
2	2	0	2	2	8	800	800	750	1	1	1
3	2	0	2	3	8	800	700	720	2	1	1
4	2	0	2	4	8	800	800	600	1	1	1
5	2	0	2	5	8	800	800	750	1	1	1
6	2	1	1	1	8	800	700	800	2	1	0
7	2	1	1	2	8	800	800		1	1	0
8	2	1	1	3	8	800	700	410	2	1	0
9	2	1	1	4	8	800	700	130	2	1	0
10	2	1	1	5	8	800	800	730	1	1	0
11	2	1	1	6	8	800	800		1	1	0
12	2	1	1	7	8	800	800		1	1	0
6	2	1	2	1	8	800	700	700	2	1	1
7	2	1	2	2	8	800	700	700	2	1	1
8	2	1	2	3	8	800	800	650	1	1	1
9	2	1	2	4	8	800	700	720	2	1	1
10	2	1	2	5	8	800	800	800	1	1	1
11	2	1	2	6	8	800	800	750	1	1	1
12	2	1	2	7	8	800	800	700	1	1	1
13	2	0	1	1	8	801	735	720	2	0	0
14	2	0	1	2	8	801	628	620	2	0	0
15	2	0	1	3	8	801	635	630	2	0	0
16	2	0	1	4	8	801	726		1	0	0
17	2	0	1	5	8	801	647		1	0	0
18	2	0	1	6	8	801	628	620	2	0	0
19	2	0	1	7	8	801	529	520	2	0	0
13	2	0	2	1	8	801	557	557	1	0	1
14	2	0	2	2	8	801	680	680	1	0	1
15	2	0	2	3	8	801	541	541	2	0	1
16	2	0	2	4	8	801	519	518	2	0	1
17	2	0	2	5	8	801	629	629	2	0	1
18	2	0	2	6	8	801	623	600	2	0	1
19	2	0	2	7	8	801	593	593	2	0	1
20	2	1	1	1	8	801	612	630	2	0	0
21	2	1	1	2	8	801	638	630	1	0	0
22	2	1	1	3	8	801	747		1	0	0
23	2	1	1	4	8	801	714	710	2	0	0
24	2	1	1	5	8	801	697		1	0	0
25	2	1	1	6	8	801	642		1	0	0
26	2	1	1	7	8	801	686	680	1	0	0
27	2	1	1	8	8	801	781		1	0	0
28	2	1	1	9	8	801	594		1	0	0
20	2	1	2	1	8	801	500	500	2	0	1
21	2	1	2	2	8	801	699	700	1	0	1
22	2	1	2	3	8	801	745	740	1	0	1
23	2	1	2	4	8	801	588	580	2	0	1
24	2	1	2	5	8	801	683	690	1	0	1
25	2	1	2	6	8	801	639	640	2	0	1
26	2	1	2	7	8	801	730	740	1	0	1
27	2	1	2	8	8	801	714	730	1	0	1
28	2	1	2	9	8	801	566	570	2	0	1
1	2	0	1	1	8	801	800		1	1	0
2	2	0	1	2	8	801	700	760	2	1	0
3	2	0	1	3	8	801	700	750	2	1	0
4	2	0	1	4	8	801	800		1	1	0
5	2	0	1	5	8	801	800		1	1	0
1	2	0	2	1	8	801	800	610	1	1	1
2	2	0	2	2	8	801	700	680	2	1	1
3	2	0	2	3	8	801	700	760	2	1	1
4	2	0	2	4	8	801	700	790	2	1	1
5	2	0	2	5	8	801	700	600	2	1	1
6	2	1	1	1	8	801	700	740	2	1	0
7	2	1	1	2	8	801	700	740	2	1	0
8	2	1	1	3	8	801	700	700	2	1	0
9	2	1	1	4	8	801	700	720	2	1	0
10	2	1	1	5	8	801	800		1	1	0
11	2	1	1	6	8	801	700	740	2	1	0
12	2	1	1	7	8	801	800		1	1	0
6	2	1	2	1	8	801	800	800	1	1	1
7	2	1	2	2	8	801	700	800	2	1	1
8	2	1	2	3	8	801	800	800	1	1	1
9	2	1	2	4	8	801	700	700	2	1	1
10	2	1	2	5	8	801	700	710	2	1	1
11	2	1	2	6	8	801	800	800	1	1	1
12	2	1	2	7	8	801	700	700	2	1	1
13	2	0	1	1	8	802	537	550	2	0	0
14	2	0	1	2	8	802	734		1	0	0
15	2	0	1	3	8	802	504	540	2	0	0
16	2	0	1	4	8	802	720		1	0	0
17	2	0	1	5	8	802	520		2	0	0
18	2	0	1	6	8	802	733		1	0	0
19	2	0	1	7	8	802	573	590	2	0	0
13	2	0	2	1	8	802	537	550	2	0	1
14	2	0	2	2	8	802	734	730	1	0	1
15	2	0	2	3	8	802	504	500	2	0	1
16	2	0	2	4	8	802	720	740	1	0	1
17	2	0	2	5	8	802	520	510	2	0	1
18	2	0	2	6	8	802	733	760	1	0	1
19	2	0	2	7	8	802	573	570	2	0	1
20	2	1	1	1	8	802	688		1	0	0
21	2	1	1	2	8	802	688		1	0	0
[truncated: 1,312 more rows]
